# Supplementary material for: Functionally Significant Features in the 5′ Untranslated Region of the ABCA1 Gene and Their Comparison in Vertebrates
Source: MDPI journal article supplement (doi:10.3390/cells8060623), 2019-06-21
Supplement: s2 [file s2]

# Supplementary Information 1 – Supplementary Tables

## Supplemental Table S1

>A1\_Chimpanzee

GGGGGCGGGGAGGAGGGGAGAGCACAGGCTTTGACCGATAGTAACCTCTGCGCTCGGTGCA  
GCCGAATCTATAAAAGGAACTAGTCTCGGCAAAAACCCGTAATTGCGAGCGAGAGTGAG  
TGGGGCCGGGACCCGAGAGCCGAGCCGACCCCTTCTCTCCCGGGCTGCGGCAGGGCAGGG  
CGGGGAGCTCCGCGCACCAACAGAGCCGGTTCTCAGGACGCTTTGCTCCTTGTTTTTCC  
CCGGTTCTGTTTTCTCCCTTCTCCGGAAGCCTTGTCAGGGGTAGGAGAAAGAGACGCA  
AACACAAAAGTGAAAAACAGTTAATGACCAGCCACGGCGTCCCTGCTGTGAGCTCTGGCC  
GCTGCCTTCCAGGGCTCCCAAGCCACACGCTGTGGGTGCTGGCTGAGGGAAC

>A1\_Bonobo

GGAGGAGGGGAGAGCACAGGCTTTGACCGATAGTAACCTCTGCGCTCGGTGCAGCCGAATC  
TATAAAAGGAACTAGTCTCGGCAAAAACCCGTAATTGCGAGCGAGAGTGAGTGGGGCGG  
GGACCCGCAGAGCCGAGCCGACCCCTTCTCTCCCGGGCTGCGGCAGGGCAGGGCGGGGAGC  
TCCGCGCACCAACAGAGCCGGTTCTCAGGACGCTTTGCTCCTTGTTTTTCCCGGTTCT  
GTTTTCTCCCTTCTCCGGAAGGCTTGTCAGGGGTAGGAGAAAGAGACGCAAAACAAAA  
AGTGGAACACAGTTAATGACCAGCCACGGCGTCCCTGCTGTGAGCTCTGGCCGCTGCCTT  
CCAGGGCTCCCAAGCCACACGCTGTGGGTGCTGGCTGAGGGAAC

>A1\_Human

AGAGCACAGGCTTTGACCGATAGTAACCTCTGCGCTCGGTGCAGCCGAATCTATAAAAGG  
AACTAGTCCCGCAAAAACCCGTAATTGCGAGCGAGAGTGAGTGGGGCCGGGACCCGCA  
GAGCCGAGCCGACCCCTTCTCTCCCGGGCTGCGGCAGGGCAGGGCGGGGAGCTCCGCGCAC  
CAACAGAGCCGGTTCTCAGGGCGCTTTGCTCCTTGTTTTTCCCGGTTCTGTTTTCTCC  
CCTTCTCCGGAAGGCTTGTCAGGGGTAGGAGAAAGAGACGCAAAACAAAAAGTGAAAAA  
CAGTTAATGACCAGCCACGGCGTCCCTGCTGTGAGCTCTGGCCGCTGCCTTCCAGGGCTC  
CCGAGCCACACGCTGGGGGTGCTGGCTGAGGGAAC

>A1\_Gorilla

GGAGGAGGGGAGAGCACAGGCTTTGACCGATAGTAACCTCTGCGCTCGGTGCAGCCGAATC  
TATAAAAGGAACTAGTCTCGGCAAAAACCCGTAATTGCGAGCGAGATTGAGTGGGGCGG  
GGACCCGCAGAGCCGAGCCGACCCCTTCTCTCCCGGGCTGCGGCAGGGCAGGGCGGGGAGC  
TCCGGGCACCAACAGGGCCGGTTCTCAGGGCGCTTTGCTCCTTGTTTTTCCCCGTTCT  
ATTTTCTCCCTTCTCCGGAAGGCTTGTCAGGGGTAGGAGAAAGAGACGCAAAACAAAA  
AGTGGAACACAGTTAATGACCAGCCACGGCGTCCCTGCTGTGAGCTCTGGCCGCTGCCTT  
CCAGGGCTCCCGAGCCACACGCTGTGGGTGCTGGCTGAGGGAAC

>A1\_Golden\_s\_n\_monkey

GGAGGAAGGCGAGAACAAGCTTTGACCGATAGTAACCTCTGCGCTCCGGGCAGCCGAATC  
TATAAAAGGAACTAGTCTCGGCAAAAACCCATAATTGCGAGCGAGAGTGAGTGGGGCGG  
GGACCCGCAGAGCCGAGCCGACCCCTTCTCTCCCGGGCTGCGGCAGGGCAGGGCAGAGCAG  
GGCGGGGGGCTCCGCGCACCAACAGGACCAAGTTCTCAGGGCGCTTTGCTCCTTGTTTTT  
CCCCTGTTCTGTTTTTCCCCCTTCTCCGGAAGGCTTGTCAGGGGTAGGAGAAAGAGAC  
GCAAAACAAAAAGTGAAAAACAGTTAATGACCAGCCACGGCGTCCCTGCTGTGAGCTCTG  
GCCGCTGCCTTCCAGGGCTCCCGAGCCACACACTGTGGGTGCTGGCTGAGGGAAC

>A1\_Black\_s\_n\_monkey

GACTGAACTACATAAACAGAGGCCGGGAAGGGGGCGGGAGGAAGGCGAGAACAAGCTTT  
GACCGATAGTAACCTCTGCGCTCCGGGCAGCCGAATCTATAAAAGGAACTAGTCTCGGCA  
AAAACCCATAATTGCGAGCGAGAGTGAGTGGGGCCGGGACCCGCAGAGCCGAGCCGAGCCGACC

CTTCTCTCCCGGGCTGCGGCAGGGCAGGGCAGAGCAGGGCGGGGGGCTCCGCGCACCAAC  
AGGACCAGTTCTCAGGGCGCTTTGCTCCTTGTTTTTCCCCTCGTTCTGTTTTCCCCCT  
TCTCCGGAAGGCTTGTC AAGGGGTAGGAGAAAGAGACGCAAAACACAAAAGTGAAAAACAG  
TTAATGACCAGCCACGGCGTCCCTGCTGTGAGCTCTGGCCGCTGCCTTCCAGGGCTCCCG  
AGCCACACACTGTGGGTGCTGGCTGAGGGAAC

>A1\_Angola\_colobus

GGAGGAAGGCGAGAACAGGCTTTGACCGATAGTAACCTCTGCGCTCCGGGCAGCCGAATC  
TATAAAAGGAACTAGTCTAGGCAAAAACCTGTAATTGCGAGCGAGAGTGAGTGGGGCGG  
GGACCCGCGAGAGCCGAGCCGACCCTTCTCTCTGGGCTGCGGCAGGGCAGGGCAGAGCAG  
GGCGGGGGGCTCTGCGCACCAACAGGACCAGTTCTCAGGGCGCTTTGCTCCTGTTTTTT  
CCCCCTCGTTCTGTTTTCTCCCCTTCTCCGGAAGGCTTGTC AAGGGGTAGGAGAAAGAGAC  
GCAAAACACAAAAGTGAAAAACAGTTAATGACCAGCCACGGCGTCCCTGCTGTGAGCTCTG  
GCCGCTGCCTTCCAGGGCTCCCGAGCCACACGCTGTGGGTGCTGGCTGAGGGAAC

>A1\_Crab\_e\_macaque

GGGGGATTCAAGTATGGAGCTCGCTCTCCCCAATCCCTCCCTCCGGCTGAGGAACTAAC  
AAAGGGAAAAAAGATTGCGGAAAGCACGATTTAGGGGAAGCAAATTCACCTGGTGCCCTT  
GGCTGCCGGGAACATGGACTAGAGAGTCTGCGGCGCAGCCCGAGCCAGCGCTTCCCGC  
GGGTCTTAGGCCGGCGGGCCCCGGCGGGGAGCGGGGGCGCAGACCGCGGACCCTGAGACA  
CCTGATACACCTCCACCCCCACCCACCTCCTCCCAACTCCCTAGCAGCTTCGCG  
GGCGGCTGAACGTCGCCCGTTTAAGAGGCGGGCCGCGCTCCACGTGCTTTCTGCTGAGT  
GACTGAACTACATAAACAGAGCGCGGAAGGGGGCGGGGAGGAAGGCTAGAACAGGCTTT  
GACCGATAGTAACCTCTGCGCTCCGGGCAGCCGAATCTATAAAAGGAACTAGTCTCGGCA  
AAAACCCCGTAATTGCGAGCGAGAGTGAGTGGGGCCGGGACCAGCAGAGCCGAGCCGACC  
CTTCTCTCCCGGTTGCGGCAGGGCAGAGCAGGGCGGGGGCTCTGCGCACCAACAGGAC  
TAGTTCTCAGGGCGCTTTGCTCCTTGTTTTTCCCCTCGTTCTGTTTTCTCCCCTTCTCC  
GGAAGGCTTGTC AAGGGGTAGGAGAAAGAGACGCAAAACACAAAAGTGAAAAACAGTTAAT  
GACCAGCCACGGCATCCCTGCTGTGAGCTCTGGCCGCTGCCTTCCAGGGCTCCTGAGCCA  
CACGCTGTGGGTGCTGGCTGAGGGAAC

>A1\_Pig\_t\_macaque

CAGCTTCGCGGGCGGCTGAACGTCGCCCGTTTAAGAGGCGGGCCGCGCTCCACGTGCTT  
TCTGCTGAGTGACTGAACTACATAAACAGAGGCCGGAAGGGGGCGGGGAGGAAGGCGAG  
AACAGGCTTTGACCGATAGTAACCTCTGCGCTCCGGGCAGCCGAATCTATAAAAGGAACT  
AGTCTCGGCAAAAACCCGTAATTGTGAGCGAGAGTGAGTGGGGCCGGGACCCGCAGAGC  
CGAGCCGACCCTTCTCTCCCGGTTGCGGCAGGGCAGAGCAGGGCGGGGGGCTCTGCGCA  
CCAACAGGACTAGTTCTCAGGGCGCTTTGCTCCTTGTTTTTCCCCTCGTTCTGTTTTCT  
CCCCTTCTCCGGAAGGCTTGTC AAGGGGTAGGAGAAAGAGACGCAAAACACAAAAGTGGA  
AACAGTTAATGACCAGCCACGGCATCCCTGCTGTGAGCTCTGGCCGCTGCCTTCCAGGGC  
TCCTGAGCCACACGCTGTGGGTGCTGGCTGAGGGAAC

>A1\_Macaque

GACTGAACTACATAAACAGAGGCCGGAAGGGGGCGGGGAGGAAGGCGAGAACAGGCTTT  
GACCGATAGTAACCTCTGCGCTCCGGGCAGCCGAATCTATAAAAGGAACTAGTCTCGGCA  
AAAACCCCGTAATTGCGAGCGAGAGTGAGTGGGGCCGGGACCAGCAGAGCCGAGCCGACC  
CTTCTCTCCCGGTTGCGGCAGGGCAGGGCAGAGCAGGGCGGGGGGCTCTGCGCACCAAC  
AGGACTAGTTCTCAGGGCGCTTTGCTCCTTGTTTTTCCCCTCGTTCTGTTTTCTCCCCT  
TCTCCGGAAGGCTTGTC AAGGGGTAGGAGAAAGAGACGCAAAACACAAAAGTGAAAAACAG  
TTAATGACCAGCCACGGCATCCCTGCTGTGAGCTCTGGCCGCTGCCTTCCAGGGCTCCTG  
AGCCACACGCTGTGGGTGCTGGCTGAGGGAAC

>A1\_Drill

GAGGAAGGCGAGAACAGGCTTTGACCGATAGTAACCTCTGCGCTCCGGGCAGCCGAATCT  
ATAAAAGGAACTAGTCTCGGCAAAAACCCCGTAATTGCGAGCGACAGTGAGTGGGGCCGG  
GACCCGCAGAGCCGAGCGGACCCTTCTCTCCCGGTTGCGGCAGGGCAGAGCAGGGCGGG  
GGGCTCCGCGCACCAACAGGACTAGTTCTCAGGGCGCTTTGCTCCTTGTTTTTACCCTC  
GTTCTGTTTTTCTCCCTTCTCCGGAAGGCTTGTCAGGGGTAGGAGAAAGAGACGCAAAAC  
ACAAAAGTGAAAACAGTTAATGACCAGCCACGGCATCCCTGCTGTGAGCTCTGGCCGCT  
GCCTTCCAGGGCTCCCGAGCCACACGCTGTGGGTGCTGGCTGAGGGAAC

>A1\_Vervet\_AGM

GGAGGAAGGCGAGAACAGGCTTTGACCGATAGTAACCTCTGCGCTCCGGGCAGCCGAATC  
TATAAAAGGAACTAGTCTCGGCAAAAACCCCGTAATTGCGAGCGAGAGTGAGTGGGGCCG  
GGACCCGCAGAGCCGAGCCGACCCTTCTCTCCCGGCTGCGGCAGAGCAGGGCGGGGGC  
TCCGCGCACCAACAGGACTAGTTCTCAGGGCGCTTTGCTCCTTGTTTTTCCCTCCTTC  
TGTTTTTCCCTTCTCCGGAAGGCTTGTCAGGGGTAGGAGAAAGAGACGCAAAACAAA  
AAGTGAAAACAGTTAATGACCAGCCACGGCTCCCTGCTGTGAGCTCTGGCCGCTGCCT  
TCCAGGGCTCCCGAGCCACACGCTGTGGGTGCTGGCTGAGGGAAC

>A1\_Bolivian\_s\_monkey

GGAGGAGGGAGAGAACAGGCTTTGACCGATAGTAACCTCGCGCTCGGTGCAGCCGAATC  
TATAAAAGGAACTAGTCTCGGCAAAAACCCCGTAATTCCGAGGGAGAGTGAGTGGGGCCG  
GGACCCGCAGAGCCGAGCCGACGCTCTCTCCCGGCTGCGGCAGCGCAGGGCAGGGCAGG  
GTGGGGGGCGCCGCGCCTGCAGGGCCAGTTCTCAGGACGCTTGCTGCTTGTTTTTTC  
TCTGGTTCAGTTTTTCTCCCGTCTCCGGAAGGCTTGTCAGGGGTGGGAGAAAGAGACGC  
CAACACAAAAGTGAAAACAGTTAATGACTAGCCACGGTGTCCCTGCTGTGAGCTCTGGC  
CACTGCCTTCCAGGGCTCCTGAGCCACACACTGTGGGTGCTGGCTGAGGTAAC

>A1\_Marmoset

GTAATTCCGAGGGAGAGTGAGTGGGGCCGGGACCCGCAGAGCCGAGCCGACGCCTCTCTC  
CGGGGTGCGGCAGCGCAGGGCAGGGTGGGGGGCGCCGCGGCCAACAGGGCCAG  
TTCTCAGGACGCTTGCTTCTTTTTTCTCCGGTTCTGTTTTCTCCCTTCTCTGGAAGG  
CTTGTCAGGGGTGGGAGAAAGAGACGCCAACACAAAAGTGAAAACAGTTAATGACCAG  
CCACGGCGTCCCTGCTGTGAGCTCTGGCCGCTGTCTTCCAGGGCTCCTGAGCCACACGCT  
GTGGGTGCTGGCTGAGGTAAC

>A1\_Tarsier

AGAGAACAGGCTTTGACCGATAGTAACCCCTGCGCTCAGTGCAGCCGAATCTATAAAAGG  
AACTAGTCTAGGCAAAAACCCGTAATTCCGTGGGAGAGTGAGTGGGGCCGGGACCCGCG  
AGCCGAGCCGACATCTCTCCCTGGGAGCGGGTGGGCAGAGCAGAGGTGCCCCACGCC  
ACCAGGGTTAATTCTCGGGCGCTTTGCTCCCTGGTTTTTTTTTTTTTTTTTTTCCC  
CTTTCCCTTTCTTTTTCTCCCTTACCAGGAAGGGTTGCCTAGGGGTGGGGGAGAGA  
CGCAAAACACAAAAGCAGAAAACAGTTAATGACCAGCCACTGTGTCCCTGCTGCGAGCTCT  
GGCTACTGCCTTCCAGGGCTCCCAAGCCACACGCTGTGGGTGCTGGCGAGGGAAC

>A1\_Mouse\_lemur

GGAGGAGGCAGAGAGCAGGCTCTGACCGATAGTAACCCCTGCGCTCAGTGCAGCCGAATC  
TATAAAAGGAACTAGTCTCGGCAAAAACCCGTAATTCCGAGAGAGACTGAGAGGGGCCG  
GGACCCGCCGGGCCGGGTGGACACCGCTGTCTCCGGCGCGGGTGGGCAGGGCAGGGGG  
CGCCGAGGGCCAGTTCTCGGGCGCTCCGCTCCCTGTTTTTTTCTCTCACTTTTCCC  
CCCTCCCTTCTCGGGAAGGGCTTGTCAGAGGTGAGGGGAAGAGACGCAAAACAAAAG  
TGGAAGCAGTTAATGACCAGCCACAGTATCCCTGCTGTGAGCTCTGGCCACTGCCTTCC  
AGGGCTCCTGAGCCACACGCTGTGGGTGCCGGCTGAGGTGAC

>A1\_Bushbaby

GACCAGCCACAGCATCCCTGCTGTGAGCTCTGGCCACTGTCTTCCAGGGCTCCTGAGGAG

CCAGACTCCGTGGGTGCCAGCGGAGGTGAC

>A1\_Long\_t\_chinchilla

TACATAAACAGAGGCCGCGGAGGGGCGGGGGCGGAGGAGAGAACAGGCTTTGACCGCTG  
GTAACCCCTGCGCTCGGCGCAGCCGAATCTATAAAAGGAACTAGTCGCGGCAAAAACCAG  
TGATTCCGAGGGAGAGTGCGAGGGGTGCGGACCTGCGGAGCCGAGCCGCACATCTGGTCC  
GCGAGCCGGGCACGCAGGGCAGGGCAGGGCAGGGCAGGGCAGGGGGCGCCGAGGACGCG  
CGCAGCTAGAGCCAGTTCTCCGGGGCGCGCCGCCCTTGCGTCCTCTCCCCGTTTTTGT  
TTTCCCCCTCCCCTTCACTGGAAGGGTTTGTCAAGGGGTGGGGGCAAGAAACGCAAAAC  
AAAAGTGAAAAACAGTTAATGACCAGCCACGGTGTCCCTGCCGTGAGCTCTGGCCGCCG  
CTCCAGGGCTCCCAAGCCACACACAAGCTTCTGCGGTGTTGGGGGTGTAAC

>A1\_Degu

TTAATGACCAGCCACAGTGTCCCTGCTGTGAGCTCTGGCCACCGCCTCCAGAGCTCCAA  
GCCACACACAAGCTTCTGCGGCATTGGAGGAGTAAC

>A1\_Naked\_mole\_rat\_m

ACTAGTCGCGGCAAAAACCAAGTGATTCCGAGGGAGAGTGAGAGGGGCCGGGGACCTGCA  
GAGCCGAGCCCACTCTTCTGGTCCCCGAGCTGGGCAGGGGAGGGCAGGGGACGCCGCGAT  
ACCCACGCACCTAGAGCCAGTTTCTCGGGGCGCTTCGCTCCCTGCGCCCCACCCCTT  
TTTTCTCGCCTTCTGGAAGGGTTTGTCAAGGGGTGGGCAAGAAACGCAAAACGCAAAAG  
AGGAAAACAGTTAATGACCAGCCACAGCGTCCCTGTTGTGAGCTCTGGCTGCTGCCTCA  
GGGCTCCCAAGCCACACACGGGCTTCTGTGGTGTGGAGGAGGCAAC

>A1\_Naked\_mole\_rat\_f

ACTAGTCGCGGCAAAAACCAAGTGATTCCGAGGGAGAGTGAGAGGGGCCGGGGACCTGCA  
GAGCCGAGCCCACTCTTCTGGTCCCCGAGCTGGGCAGGGGAGGGCAGGGGACGCCGCGAT  
ACCCACGCACCTAGAGCCAGTTTCTCGGGGCGCTTCGCTCCCTGCGCCCCACCCCTT  
TTTTCTCGCCTTCTGGAAGGGTTTGTCAAGGGGTGGGCAAGAAACGCAAAACGCAAAAG  
AGGAAAACAGTTAATGACCAGCCACAGCGTCCCTGTTGTGAGCTCTGGCTGCTGCCTCA  
GGGCTCCCAAGCCACACACGGGCTTCTGTGGTGTGGAGGAGGCAAC

>A1\_Squirrel

GCTCGGCGCAGCCGAATCTATAAAAGGAACTAGTCGCGGCAAAACCCAGTAATCCGAGG  
GAGAGTGAGTGGGGCCGGGACCTGCCGAGCCGAGCCACACCTCTCTTCCCTACGTGCG  
TGGGCAGGACAGGGGGCTCCACAGGACGGCGCAGCCGAAGCCATTTCAGGGGCGCTT  
GCTCCCCGTTTTCCCACTTCTTCTCTGCCATTACCCGGAACGGTTGGTCAAGGGGTG  
GGGAAAGAGACGCAAAACAAAAAGTGAAAAACAGTTAATGACCAGCCACAGCGTCTGCT  
GTGAGCTTCGGCCAGTGCTCCAGGGCTCTGAGCCACACAGGTTGCTTTGGGTGCCG  
GCTGAGGTAAC

>A1\_Chinese\_hamster\_CG

TAACCCCGTGCTCGGCACAGCCGAATCTATAAAAGGAACTAGTCGCGGCAAAAACCAGT  
AATTCGAGGGCGAGCGAGCGGGCCGGGACCGGCCGAGCCACATCTCTACACAGCGC  
AGGGCTGGGCAGGGGCGCCTCGGGACCCGCTACCCACAGCCGGTTTGGGGCGCTGCTCT  
GCTCCCTGTTTCCCTTCACTTTTCCTCCCCCTTGCTGGAAGGGTTTGTGACGGGTGGC  
TAAACAGACGCAAAACACAAAGTGAAAAACAGTTAATGACCAGCCACAGCGTCGCTGCTG  
TGCACTCTGGCTGCTTCTCCAGGGCTCTGGAGCCACACGCACGGGTTGCTGTGGGTTC  
AGCGGAGGTAAC

>A1\_Golden\_Hamster

GCGAGCGGGCCGGCACGGGCCGGGCCCACTTCTCTCCACCTAGCGCAGGGCTGGGAGGG  
GCGCCGCGGGGACCCGCTCGCCACAGCCGGTTTGGGGCGCTGCTCTGCTCCCTGTTTCT  
TCCTCTCCCCCAACACACACTTTTCCCTCCCCCTTTCTGGAAGGGTTTGTGACGGGTG  
GGAGAAACAGACGCCAACACCGAAGTGGAACAGTTAATGACCAGCCACAGTGCCGTGT

GCTCTGGCTGCTTCTCCAGGGCTCTGGGGCCACACACACGGCTCGCCGTGGGTTCAGC  
AGACGCAAC

>A1\_Prairie\_vole

AGCAATTCCGAGGGCGAGCGAGCGGGCCGGGACCGAGCCCACACCTCTCTCCGCAG  
CGCAGGGCTGGGCAGGGGCGCCGCGGGACCCGCTCAGCCACAGCCGGTTTGGGGCGCTGC  
TCTGCTCCATTTCCCCCACCCCACTTTTCTCTCCCCCTTCTGGAAGGGTTTGTGCAG  
GGTGGGAGACACAGACGAAACACCAAAGTGGAAGACAGTTAATGACCAGCCACAGCGTC  
ACTGCTGCGCGCGCTGGTTGCTTCTCCAGGGCTCTCGAGCCACATGCACAGGTTGCTCT  
GGGTGCCAGCAGAGGTAAC

>A1\_N\_A\_deer\_mouse

AGTAATTCGAGGGCGAGCGAGCGGGCCGCGACCGGCCAAGCCACATCTCTCTCCGCAG  
CGCAGGGCTGGGCAGGGGCGCCGCGGGACCCGCTCAGTCACAGCCGGTTTGGGGCGCTCC  
TCTGCTCCCTGGTCCCCCACTTTTCTCCCCCTCCCCCTTCTGGAAGGGTTTGTGCAAG  
GTGGGAGAACACAGACAAAACACAAACTGGAAAACAGTTAATGACCAGCCACAGCGTC  
ACTGCTGTGTCTGTGCTGCTTCTCCAGGGCTCGCGAGCCACACACAGGTCGCTGT  
GGGTGCCAGCGGAGGTAAC

>A1\_Mouse

AGTAATTCGAGGGCGAGCGAGCGGGCCGGGACCGGCAGAGCCCACTTCTCTCCGCGGCG  
CAGCGCAAAGCTGGGCAGGGGGCGCCGCGGGACCCGCGCAACCACAGCCGGCTTGGGGAG  
CTGCTCTGCTCCCTGTTTCCCCCACTTTTCTTCCCCCTTCTGGAAGGGTTTGTGCAG  
GGGTAGGGAAAACAGACTCAAACAGCAAAGTGAAAAACAGTTAATGACCAGCCACAGAGT  
CACAGCTCTGTGCTCTGGCTGCTCCCTCCAGGGCTCTCGAGCCGACAGCGCAGGTCGCTG  
TGGGTGCCGGCTGTGGTGAC

>A1\_Algerian\_mouse

AGTAATTCGAGGGCGAGCGAGCGGGCCGGGACCGGCAGAGCCCACTTCTCTCCGCGGCG  
CAGCGCAAAGCTGGGCAGGGGGCGCCGCGGGACCCGCGCAGCCACAGCCGGCTTGGGGAG  
CTGCTCTTCTCCCTGTTTCCCCCCCCCACTTTTCTCCCCCTTCTGGAAGGGTTTGTG  
TGCAGGGGTAGGGAAAACAGTCTCAAACAGCAAAGTGAAAAACAGTTAATGACCAGCCAC  
AGAGTCACAACTCTGTGCTCTGGCTGCTCCCTCCAGGGCTCTCGAGCCACAGACGCAGGT  
CGCTGTGGGTGCCGGCTGCGGTGAC

>A1\_Ryukyu\_mouse

AGTAATTCGAGGGCGAGCGAGCGGGCCGGGACCGGCAGAACCCACTTCTCTCCGCGGCG  
CAGCGCAAAGCTGGGCAGGGGGCGCCGCGGGACCCGCGCAGCCACAGCCGGCTTGCTCCG  
TGTTTCCCCCACTTTTCTCCCCCTTCTGGAAGGGTTTGTGCAGGGGTAGGGAAAAC  
AGACTCAGACAGCAAAGTGAAAAACAGTTAATGACCAGCCACAGAGTCACAGCTCTGTGC  
TCTGGCTGCTCCCTCAGGGCTCTCGAGCCACAGACGCAGGTCGCTGTGGGTGCCGGCTG  
CGGTGAC

>A1\_Shrew\_mouse

AGTAATTCGAGGGCGAGCGAGCGGGCCGGGACCGGCAGAGCCCACTTCTCTCCGCGGCG  
CAGCGCAAAGCTGGGCAGGGGGCGCCGCGGGACCCGCGCAGCCATAGCCGGCTCGGGAAG  
CTGCTCTGCTCCCTGTTTCTCCCACTTTTCTCCCCCTTCTGGAAGGGTTTGTGTAG  
GGGTGGGGAAAACAAGACTCAAACAGCAAAGTGAAAAACAGTTAATGACCAGCCACGGAG  
TCACAGCTCTGTGCTCTGGCTGCTTCTCCAGGGCTCTCAAGCCACACGCGCAGGTTGCT  
GTGGGTGCCGGCTGCGGTGAC

>A1\_Rat

TAACCCCGGCGCTCGGCACAGCCGAATCTATAAAAGGAACTAGTCGCGGCAAAAACAGT  
AATTCGAGAGCGAGCGAGCGGGCCGGGACCGGCAGAGCCCACTTCTGTCTCTGCGGCTC  
AGCGCAAAGCTGGGCAGGGGGCGCCGCGGGACCCGCGCAACCACAGCCGGCTTGGGGAGC

TGCTCTGCTCCCTGTCCCCACCCCTACTTTTTCTCCCGGTTTCTGGAAGGGTTTGTGT  
AGGGGTTGGGTAAACAGACGCAAACAGCAAAGTGGAACAGTTAATGACCAGCCACAGT  
GTCACAGCTCCGTGCTCTGGCTGCTTCCTCCAGGGCTCTCAAGCCACACACAGATCAC  
TGTGGGTGCTGGCAGAGGTAAC

>A1\_U\_m\_b\_mole\_rat

GGCGAGCGACGGGGCCGAAGCTGCGCAGGGCAGGGGCACGCCGACCCGCAACCCACAGGCA  
CTCTGGGGGTGCTCCACTCCCCGCCCCACCCCGCTTTCTTTCTCTCCCCTTCTCTAGA  
AGGGTTTGTCCAGGGGTGGGGAACAGACGCAAACATCAAAGTGGAACAGTTAATGA  
CCAGCCAAAGCGTCCCTGCTGTGAGCTCTGGCCACTGCCTCCAGAGCTCTGAGCCACAC  
ACGCAGGTCACCGTGGGTGCCAGCAGAGGTAAC

>A1\_Lesser\_E\_jerboa

CAGTTAATGACCAGCCACAGCGTCCCTGCTGTGAGCTCTGGCCACTGCCTCCAGGCCTGT  
GGAGCCACAAGCAGGACAGTGTGAAGGGTCAGCAGAAGAAAC

>A1\_Rabbit

AGGAGAGAACAGGCTTTGACCGATAGTAACCCCCGGCGCCCGGAACGCCCAATTCTTTA  
AAAGGAACTAGTCGCGGAAAAAACAGTTATTTCCGAACGAAGATGAGTTGCGGTCGGAA  
CGGCCAGCGCCGCGCCGACCCCTTCTTCCAAGGCGGGCGGACAGGGTTGGGGGCC  
CCAGGACCCCGACAGCCAGGCCTATTGCTTCCTGCGCTTTGCTCCCTAATTTTTTTTT  
GCCCTCTTCTTTTCTCCCTTCTCCGGAAGGTTTGTACGGGTTGGGGAAAGAG  
GCGCAAACAAAGTGAAAGCAGTTAATGACCAGCCACAGCGCTTGTCTACAAGCTCTG  
GCCGCTGCCTCCAAGGGCGAGCCACAAGCAGGTTGCCGTGGGTGCCTGCTGAGGTAAC

>A1\_Ferret

GGTTTTTCAAGGGTTGGGGACAAAGACGCACGCACAAAAGTGGAACAGTTAATGACC  
AGCCACAGCGGCCCTGCCGTGAGTTGCGGCCACTGCCTCCACGGGCTCCTGAGCCACAG  
CATCTGCTGGGGTGCTAGCAGCGGTAAC

>A1\_Dog

TTAATGACCAGCCACGGCGGCCCTCCACGGGCCCCGAGCCACACGCACGGTGCTGGC  
GCCGCCGCTGAGCCGAC

>A1\_Cat

GAAACAGGCTTTGACCGATAGTAACCTGGCGCTCAGCGAGCCGAATCTATAAAAGGAAC  
TAGTCGCGGCAAAACCCGGTAATCCGAGGGAGAGTGAGTGGCGCCGGATCCGCCGAG  
CCCAGCGGACACCTCTCTCTCGGGCGCAGGTGGGCAGGGCAGGGGGGCGCCGCTGGAC  
CGGCGCTGCCAGAACCAATTTTCGGGGCGCTTTGCTCCTCTTTTCCCCCTTTTCCCT  
TCTCCGGAAGGGTTTTTCAAGGGGTGGGGAAAAGACGCACACAAAAGTGGAACAG  
TTAATGACCAGCCACAGCGTCCCTGCTGTGAGCTGCTGCTGCCTCCAGAAGCTCCTG  
AGCCACACACAGGTTGCTGCGGCTGCCGGCTGAGGAAAC

>A1\_Horse

GTAATTCCGAGAGAGAGTGAGTGGGGCTGGCACCGGCCGAGCCGAGCTGACCCCTGTCCG  
CCCGGGCGCAGGTGGGCAGGGCCGGGGCCCCGCGGACCAGCGCCACCAGAGCCAATTC  
GCGGCGCGCTTTGCTCCTTTTCCCCCTTTTACCAGGAAGGATTTCAAAGGGTGGG  
GAAAGACAGGCAACACAAAAGTGGAACAGTTAATGACCAGCCACAGCGTCCCTGCCC  
TGAGCTCTGGCCACGGCCTTCACAGGCTCCAAGCCACACGCAGGTTGCCGTGGGTGCCA  
GCTGAGGTAAC

>A1\_Cow

AAGAGGGTGGCCTATTGACTGGCCATGACTGTGAAGTGGGACGCTTTCAACCAAGTAAC  
GGAAATGTGCACAGGGGCAGAAATGAGTGTGCTACTAGCTTTGAAGCATTGAGAAATCTA  
GTCAATACATAGTACGGCCTCTTTTGGTTTGGTTTGTGTTGCTTCCTTGAAAA  
CTGATGTAGAAATGTCCCTTTGGCCCCAGTTACCTGAGAAGAGGATTTGGGCATTGCCAA

AACCTCCTCTTTGGATAAAATTGCTCCCAGCAGTGGTCACCATGTTCTGAGGTGGGAGGA  
GGGAATTATGCAAGAGGCCAGGGCTATGCCAAGGTGGGTAGGAAAGCGGGGCAGGTACC  
CAGCGAAGCGGAGCGATACCTTCCACCGCTGCATAGGCTACTTTTGCTGACGTCTCTGC  
GTGTCTCCTGGAGGGTCTCTGAAGCCAGGATCTGTGTCTGGAAATGCAGAAACCCCGCTT  
TAGGAAAACACTCTCCAGAAAGCTTCTCCTGGCCGTTCTCGTCTCGCGCCCATTCTGCA  
GAGTTAATGACCAGCCACAGCGTCCCTGCTGTGAGCTCCAGCCACTTCTCTCCCGGGCTC  
CCGAGCCTCACGCAGGCTGCTGTGGTGTGGCTGAGGTAAC

>A1\_Sheep

CTCTCTACCCCGCGCAGGTGGGCAGAACAGGGGGCGCCGTGCAACCAGCGCCGCACAG  
CCAATTTCTCGGGGCGCTTTGCTCCCTTTACCCCTTCTTTTCCGAAGGGTTTTTCAAG  
GGGTGGGGAAAGAGCCACAAACACAAAAGTGGAAAACAGTTAATGACCAGCCACAGCGT  
CCCTGCTGTGAGCTCCAGCCACTTCTTCCAGGCTCCCGAGCCTCACGCAGGCTGCTGT  
GGTGTGGCTGAGGTAAC

>A1\_Armadillo

GCCGAGCCCAGGCTTCGACCGATAGTAACCCCGCGCCACCGAATCTATAAAAGGAECTA  
GTCGCGGCAAAACCCGGTAATTCCAAGCCAGAGTGAGTGGGGCCCCGATCGGCAGAGGC  
CAGCCGACGCGTCGCTGCCCCGGTGCGGGTGGGCTGGGCAGGGGCGTCGCAGGACCCGC  
GCCGCCGCCCGGGCCAGTTCCACGAGGCTTTGCCATTGTTTTCTGCTTTTCCCCAGTT  
TCCAGAAGGGTTCAGTCGAGGGGTGGGGAAAGAGTCGCAGACACCAAAGTGAAAAACAG  
TTAATGACCAGCCACAGCGTCCCTGCCGTGAGTTCCGGCCACTGCCCCACGGGCTCCCG  
ACGAGCCACACGCAGGTTGCCTGGGCACGGCTGAGGTAAC

>A1\_Tasmanian\_devil

TTAATGACCAGCCACAGTGTCCCTGCCAGCGCTACCTCTGCTCCCTCCACTATCTGCCT  
GGCTGAAGGGAGCTGTGGGTGTATGCTGAGGAAAG

>A1\_Opossum

GAAAGAGAACAGAGTTTGACCGATAATAACCCCGCTGTTGAGCGCAGCCGAATCTATAAA  
AGGAACTAGTCCAGGCTAAAAACCTTAATTCTGGGAGAGAGGGACTGAGGACCATATGC  
TAGGCTGTGCAGGAGGAGGCCGTTGGTGCCCACAGGAAAGCCTAGGCAGGGGTTGGCAAA  
GGCAAGGGAGGGGGTCAACAAAGGGGTATCGGAGGGGCGAGAGCCCGTTTGTGCGCTCTC  
TCTCTCTCTCTCTTTTTTTTTTTTGTTCGCAAGTATTTCCAAAGGGGTAGGGGAG  
AGAGTCCCAGAAACAAAAGTGAAAGCAGTTAATGACCAGCCACGGTGTCTTGCCAGT  
GCTGCCTCTGCTCCCTCCACTATCTGCTGGACTGAGGGGAGCTGTGGGTGCGTGCTGAGG  
AGAG

>A1\_Platus

TGCTGTAATGACTAATGAGAACTCTCTCTCTCTGTTTTATCTTCCAGTTAATGACCA  
GCCACAGTGTCCCTGCAGTGTGCTGTTGCCACTGCCCTGTACACCAGGGGAGCTGTGC  
CTGCATGCTGAGGAAAG

>A1\_Chicken

CCGGGAGCGCGGCCGCGTCGGGGCCGGATCCGTGAGTGGCAGAGCTGCGCTCGGGAGAA  
GTGGAGCGAAGCGAGCCGACTCGGCTCGGTGCGGGACCGAGGGCGGCTGCCAGGGCTCC  
CCGGCCCGAGTTAATGCCAGCCATAACGTCCTTGTGTGTACTGCTGCTGCTGCACAA  
AGGGAAGAAGGCATTGCTGAAGAACG

>A1\_Duck

AGTTAATGCCAGCCACAACCTCCTTGCTGTATACTGCTGCTGCTGCACAAGAGGAGCAA  
GGCGTTGCTGAAGAGCG

>A1\_Flycatcher

TTAATGCCTGGCCACAACATCTGTACTGTACTGCTGCTGCTACACAAAGAGAGCTTCTAG  
TCTTTGCTGAAGGAAG

>A1\_Anole\_lizard

GGCAGAAAGGAAGCCGCGCTTGACCGATAATAACCTCCGCGCGCAGCGCCGGCGGGATC  
TATATAAGGCGCTCCGAGTGCGGGACTGGCCCTGGTTTGGCCCCAGCCTCGTCGTTGGGA  
GCCACAAAGGACGACCGGAGAAGCCCTCCATCGACTGGCTCTCCGATCTACTCCGGGAGG  
GAGAGAAAGATCGCTCCCCATCAAAGTGGCGAGGAGTTGATGACCAGCCACAGTAGCTC  
TGCTGTGTGCTGTTTCCATCCAAGGTGCTGATTGCTGGTACATACAGAAGGAAG

>A1\_Coelacanth

GCCTGTACAGCGCTGCTCGGTGTCACCTATAAAAGCAACTAGAGGTTAAAAAAAACAT  
TCAGTCTTACATCGAATCAGAGACACCTCAAGACCATATATATCGTTCACAGTAAACAAA  
GAAAAGAAAAAATATATATATTTAAGGATTTTAAAGAAAGATACTATATATTTCTAGTA  
GGGATTTGTCATTTTTCTGGTTTAACTATATTTTACATATACAGCCAAGTGGGGAAAAAA  
GTTAATGTCCGACAACAATATCCCTGCTGCATGAGTGGAGCTGCTACTGGGAAAAG

>A1a\_Platyfish

TGACCGTTAGTTACCTTTTGCTGCGCTCCGCGTCGAGCTGCGTATAAAAGCCTGCCTGGG  
GAGAAAAAACAGTTTTCCTAGACACTGACAAAGAGCAAGGAGGACCGCGCGTCAGAGGG  
ACGCAGTTGTTAACTCGTTTTTCGCTTTTGTGTTGAGAAAAGACGTTCAATTGATGAGA  
GGCAGAAGAGCGAGTAAACACATTAAGATCAAGTGAGGAGCTGGCGTTGGCTTGTGAGG  
TTAGGAAGACGGCAAC

>A1a\_Medaka

GCGAGACTACCGCGAGTCCCGACAAGGGAAGTTTATCCTCGTTTTCTGGGACACCCT  
ATGACACGAACAAGAGTGGATAGAAAAAAGTGAGGATCAGGAGTTTGCTTGTGAAGGTGG  
GGAGAAGACAAC

>A1a\_Tilapia

TGAGGAGCTGGAGCGTGCTCAGTGAGGTTGGGAAGACGGCAAC

>A1a\_Tetraodon

TCTAGCCCGTTTACTGAGCGTCTTTTCTCTGTCAACTTTGCTTCATTAGTGAGGAGCTGG  
AGCGTGCTCGGTGAGGTTGGGACGACATCAAC

>A1a\_Zebrafish

GGAAAAAGGTCCGTCCATAAGAACACAAAGCACACCAGTACAATATCGCTCGGAGAGAG  
TTTAAACAGCTGCTTTATCTCTCTTTTCTAAAAGGATTTACAGTTTATATGAAATAAGG  
AACAATCATTAAAGGAGCAAGAAATAGCGCTTCTGTAAGGCGGCACGGATAGTGTGTATCC  
GTGGTAAG

>A1b\_Tilapia

ACCGGTTTGTAAAACTTCCACCAACATTCTTGTAAGTTCGTTTCTCCTCGCGGTGCGGT  
TTTATTTGAAGTCTCGCGGAAGTGTGTGTGACTATTGGGGCTTTACTCCGGTGAGT  
TTTGTCGGCGGCTGCTGCTCCGTGAGCAGCAG

>A1b\_Cave\_fish

TTTATTTATTCATTTTACTCCAACATATACCTATAAATAGAAAAATCATAGAAAAATCAGA  
GCTGTATAATAACTATATCAAGACAGAAAGAACAAAATGGAGCTGCCAACATTGTATTCT  
TTAATTTTACATTTTCACTCATTATCCCTAACTATTCTGGCATAGTCCTCACACTTTC  
TTTGATCTCCAAATCAATTCTCTTCTTATTTCTTAATTTTCCCATTTTCTAGTTT  
TTCGGCATGTGATTGAATCAGTGTAAGTCAATTGGCCACATTAACTTTGAACAGTGATG  
GCTTGACCGTAAGACCACACACAAGCCCTCGGCCCATATGAATAGTTTCATTAGCATAGA  
ACAATGGCGACAGATTGACTCTCAGACTGCCATTGAAGAGCTTTGATCAAAAGCTGCCGT  
TCCTGGAGCAGTACCTGGAGCTGTGAAATTCCTTACAGAACGATTACCAGACTACAGT  
GAAGTCCATTATTACTATTATAAAAGAAGAGAGGGGTGGGTGTTCTGAGTGAGATG  
AGTCAGGACACAACAGGACAGGAGAAGACAGGAGGACGGGGGAAACGTGAGCAGAACGGA  
TGCAGATAGGCTGGTGCACTTTGTCTGGACCTTTGAGCTGCTCTGTTGGTTGCACTTGG



```

AATCCTTCTTTTACTCAGCCTGTGCTCTCTGTGTCTCACTGTCAGCTGGAGAGCGCAG
CGTGAGGAGGACCTGAGTGAAG

>A1b1_Zebrafish

GACCGACAGTAACCCAGGCGCTCCGAGCGGATGCGCTATAAAACCACTTTAAACCCTTCA
GATGCCCTTCACACGAGAACCACCGCGTCAGACTCCACAAGGACGAATAAACATCTGA
TTCACCTGGATTACAACGAATGTCCTACACAAGTCATCAGCTGTGTCTGGTTGAGAGCTG
AGCGCGAAGAGGGACCCGAGTGAAG

>A1b2_Zebrafish

GAATAGCACCATTAGCATAGAGCAAGATCTCGACTTCCAGCAAACCTGTTTCATTGAAAT
GATCAAACCATTAAGAGACTCTAACGGCCTGCGAAATTCCTTTCTTGATGAATCTCTGAC
ACTACAAGGTCCACCACTTCCAGGAATTCTGGAAAAAAAAAAGACAGGAGATGAAAAGGG
AAGACGTGTGAGAGACGAAGCGAACGCTGGAGAGTAAGATAGGAGCTGCTGCACTTTGTC
CTGGACTTTTGAGCTGCTCTGTTGGTCGCTGGATGCTTTTTTGTCACTCAGCCCGT
CTCCGTTGTGTCATTGCAGTTGAGAGCTGAGCGCGAAGAGGGACCCGAGTGAAG

>A1a_Spotted_gar

CTGGACTCGAAGCCTGCACTTCCCTCACAGACTTCGTTATTGCGTGGCCCTTACCTTAA
TAAATCGATTTTAAATGCTCATAGATCCTCACATATGCCTTGGGAAATTTGTTCCATC
TATAGGAGTTAAATCCTGTTTTCAACGCTCGGATTCTTAATTTTCATTGGGACCTCTTT
GATTGTGAGGAATAAACTCACATTTCTTGAGCGTTCATAGCTTAATTTTCTCTTGCGAA
ACGAATAGTTTTTTCTTTATTTGTCGCGCTGGAAGGCAGAAGGACAAAACACAATGGCAG
GGTAGCCCTTTTAAGAGCTGTTTTGACTCTACACGTGCTTCGCTTGCAATGACTGAGCCA
CACAAACACAGCGGAGACTGGGATCTACTCGACCGAGAGTAACCCCTGCCTCCTCAGCGCA
GTGTACAGAGAGCGCTATAAAAAACAGCTAAAGGTTAAAAACGGCAGTTTCACAGACCGAG
ACCGCACGGTTCACAGCGCAGAGAGAAGATACAACAAAAGGAATCTTTGCTTCGTTTA
CTTTAAAGGATTTAGCATTTATGCATAAAGACACATAAAGACTGCGCGAGATAATAGTCG
AGCGCCGGAGTCTGTGAGCTGGAACCTCTGAGGAAAG

```

**Supplemental Table S1:** Multi-FASTA format file containing *ABCA1* 5'UTR sequences of 55 species (59 transcripts without intron sequences) downloaded from the Ensembl database and evaluated within comparative analyses.

## Supplemental Table S2

Table S2: Summary of 59 transcripts from Ensembl and comparison of 5'UTR sections

| Sp. No.                                 | Sp. Name                                                               | Transcript |            |                          | Lenght of 5'UTR sections (bp) |              |             |        | Length of protein (aa) |      |
|-----------------------------------------|------------------------------------------------------------------------|------------|------------|--------------------------|-------------------------------|--------------|-------------|--------|------------------------|------|
|                                         |                                                                        | No.        | Name       | ID                       | Before intron                 | After intron | Whole 5'UTR | Intron |                        |      |
| 1                                       | Chimpanzee ( <i>Pan troglodytes</i> )                                  | 1          | ABCA1-201  | ENSPTRT00000039236.5     | 320                           | 92           | 412         | 31889  | 2261                   |      |
| 2                                       | Bonobo ( <i>Pan paniscus</i> )                                         | 2          | ABCA1-201  | ENSPPAT00000058048.1     | 312                           | 92           | 404         | 24206  | 2102                   |      |
| 3                                       | Human ( <i>Homo sapiens</i> )                                          | 3          | ABCA1-202  | ENST00000374736.7        | 303                           | 92           | 395         | 24163  | 2261                   |      |
| 4                                       | Gorilla ( <i>Gorilla gorilla</i> )                                     | 4          | ABCA1-201  | ENSGGOT00000009477.3     | 312                           | 92           | 404         | 24188  | 2261                   |      |
| 5                                       | Golden snub-nosed monkey ( <i>Rhinopithecus roxellana</i> )            | 5          |            | ENSRROT00000053936.1     | 323                           | 92           | 415         | 26077  | 2261                   |      |
| 6                                       | Black snub-nosed monkey ( <i>Rhinopithecus bieti</i> )                 | 6          | ABCA1-201  | ENSRBIT00000047284.1     | 360                           | 92           | 452         | 25732  | 2261                   |      |
| 7                                       | Angola colobus ( <i>Colobus angolensis palliatus</i> )                 | 7          | ABCA1-201  | ENSCANT00000035942.1     | 323                           | 92           | 415         | 25552  | 2261                   |      |
| 8                                       | Crab-eating macaque ( <i>Macaca fascicularis</i> )                     | 8          | ABCA1-201  | ENSMFAT00000023951.1     | 715                           | 92           | 807         | 24586  | 2261                   |      |
| 9                                       | Pig-tailed macaque ( <i>Macaca nemestrina</i> )                        | 9          | ABCA1-201  | ENSMNET00000039779.1     | 425                           | 92           | 517         | 24876  | 2261                   |      |
| 10                                      | Macaque ( <i>Macaca mulatta</i> )                                      | 10         | ABCA1-201  | ENSM MUT00000028999.3    | 360                           | 92           | 452         | 24582  | 2261                   |      |
| 11                                      | Drill ( <i>Mandrillus leucophaeus</i> )                                | 11         |            | ENSMLET00000035934.1     | 317                           | 92           | 409         | 31834  | 1919                   |      |
| 12                                      | Vervet-AGM ( <i>Chlorocebus sabaeus</i> )                              | 12         | ABCA1-201  | ENSCSAT00000009382.1     | 313                           | 92           | 405         | 24875  | 2261                   |      |
| 13                                      | Bolivian squirrel monkey ( <i>Saimiri boliviensis boliviensis</i> )    | 13         | ABCA1-201  | ENSSBOT00000055395.1     | 321                           | 92           | 413         | 26130  | 2261                   |      |
| 14                                      | Marmoset ( <i>Callithrix jacchus</i> )                                 | 14         | ABCA1-201  | ENSCJAT00000032583.2     | 229                           | 92           | 321         | 25833  | 2261                   |      |
| 15                                      | Tarsier ( <i>Carlito syrichta</i> )                                    | 15         | ABCA1-201  | ENSTSYT00000031652.1     | 324                           | 92           | 416         | 22034  | 2261                   |      |
| 16                                      | Mouse Lemur ( <i>Microcebus murinus</i> )                              | 16         | ABCA1-201  | ENSMICT00000063500.1     | 310                           | 92           | 402         | 20008  | 2261                   |      |
| 17                                      | Bushbaby ( <i>Otolemur garnettii</i> )                                 | 17         | ABCA1-201  | ENSOGAT00000009127.2     | 0                             | 90           | 90          | 0      | 2264                   |      |
| 18                                      | Long-tailed chinchilla ( <i>Chinchilla lanigera</i> )                  | 18         | ABCA1-201  | ENSCLAT00000022302.1     | 375                           | 97           | 472         | 22789  | 2260                   |      |
| 19                                      | Degu ( <i>Octodon degus</i> )                                          | 19         | ABCA1-201  | ENSODET00000008072.1     | 0                             | 97           | 97          | 0      | 2260                   |      |
| 20                                      | Naked mole-rat male ( <i>Heterocephalus glaber male</i> )              | 20         | ABCA1-201  | ENSHGLT00100013811.1     | 250                           | 97           | 347         | 16484  | 2260                   |      |
| 20                                      | Naked mole-rat female ( <i>Heterocephalus glaber female</i> )          | 21         | ABCA1-201  | ENSHGLT00000016174.1     | 250                           | 97           | 347         | 16244  | 2260                   |      |
| 21                                      | Squirrel ( <i>Ictidomys tridecemlineatus</i> )                         | 22         | ABCA1-201  | ENSSTOT00000001269.3     | 275                           | 96           | 371         | 20032  | 2261                   |      |
| 22                                      | Chinese hamster CriGri ( <i>Cricetulus griseus crigri</i> )            | 23         | Abca1-201  | ENSCGRT00000004943.1     | 272                           | 100          | 372         | 16750  | 2261                   |      |
| 23                                      | Golden Hamster ( <i>Mesocricetus auratus</i> )                         | 24         | Abca1-201  | ENSMAUT00000018446.1     | 215                           | 94           | 309         | 17080  | 2261                   |      |
| 24                                      | Prairie vole ( <i>Microtus ochrogaster</i> )                           | 25         | Abca1-201  | ENSMOCT00000016062.1     | 219                           | 100          | 319         | 17510  | 2261                   |      |
| 25                                      | Northern American deer mouse ( <i>Peromyscus maniculatus bairdii</i> ) | 26         | Abca1-201  | ENSPENT00000010703.1     | 219                           | 100          | 319         | 16816  | 2260                   |      |
| 26                                      | Mouse ( <i>Mus musculus</i> )                                          | 27         | Abca1-201  | ENSMUST00000030010.3     | 220                           | 100          | 320         | 15580  | 2261                   |      |
| 27                                      | Algerian mouse ( <i>Mus spretus</i> )                                  | 28         |            | MGP_SPRETEiJ_T0064864.1  | 225                           | 100          | 325         | 16109  | 2261                   |      |
| 28                                      | Ryukyu mouse ( <i>Mus caroli</i> )                                     | 29         | Abca1-201  | MGP_CAROLIEiJ_T0062396.1 | 207                           | 100          | 307         | 16091  | 2277                   |      |
| 29                                      | Shrew mouse ( <i>Mus pahari</i> )                                      | 30         | Abca1-201  | MGP_PahariEiJ_T0077533.1 | 221                           | 100          | 321         | 16933  | 2261                   |      |
| 30                                      | Rat ( <i>Rattus norvegicus</i> )                                       | 31         | Abca1-201  | ENSRNOT00000024564.7     | 282                           | 100          | 382         | 15826  | 2261                   |      |
| 31                                      | Upper Galilee mountains blind mole rat ( <i>Nannospalax galili</i> )   | 32         | Abca1-201  | ENSNGAT00000004944.1     | 173                           | 100          | 273         | 24815  | 2261                   |      |
| 32                                      | Lesser Egyptian jerboa ( <i>Jaculus jaculus</i> )                      | 33         | Abca1-201  | ENSJJAT00000027060.1     | 0                             | 102          | 102         | 0      | 2261                   |      |
| 33                                      | Rabbit ( <i>Oryctolagus cuniculus</i> )                                | 34         | ABCA1-201  | ENSOCUT00000009288.3     | 323                           | 95           | 418         | 24629  | 2261                   |      |
| 34                                      | Ferret ( <i>Mustela putorius furo</i> )                                | 35         | ABCA1-201  | ENSMPUT00000007173.1     | 51                            | 98           | 149         | 20857  | 2261                   |      |
| 35                                      | Dog ( <i>Canis familiaris</i> )                                        | 36         | ABCA1-201  | ENSCAFT00000004346.3     | 0                             | 78           | 78          | 0      | 2262                   |      |
| 36                                      | Cat ( <i>Felis catus</i> )                                             | 37         | ABCA1-201  | ENSFCAT00000004356.4     | 300                           | 99           | 399         | 20563  | 2261                   |      |
| 37                                      | Horse ( <i>Equus caballus</i> )                                        | 38         | ABCA1-201  | ENSECAT00000011043.1     | 212                           | 99           | 311         | 20272  | 2261                   |      |
| 38                                      | Cow ( <i>Bos taurus</i> )                                              | 39         | ABCA1-201  | ENSBTAT00000027538.3     | 543                           | 98           | 641         | 2481   | 2261                   |      |
| 39                                      | Sheep( <i>Ovis aries</i> )                                             | 40         | ABCA1-201  | ENSOART00000008003.1     | 160                           | 98           | 258         | 19661  | 2261                   |      |
| 40                                      | Armadillo ( <i>Dasypus novemcinctus</i> )                              | 41         | ABCA1-201  | ENSNDOT00000009223.3     | 300                           | 100          | 400         | 20170  | 2264                   |      |
| 41                                      | Tasmanian devil ( <i>Sarcophilus harrisii</i> )                        | 42         | ABCA1-201  | ENSSHAT00000008717.1     | 0                             | 95           | 95          | 0      | 2264                   |      |
| 42                                      | Opossum ( <i>Monodelphis domestica</i> )                               | 43         | ABCA1-201  | ENSMODT00000020693.2     | 329                           | 95           | 424         | 25789  | 2260                   |      |
| 43                                      | Platypus ( <i>Ornithorhynchus anatinus</i> )                           | 44         | ABCA1-201  | ENSOANT00000004496.2     | 0                             | 137          | 137         | 0      | 2266                   |      |
| 44                                      | Chicken ( <i>Gallus gallus</i> )                                       | 45         | ABCA1-201  | ENSGALT00000024891.7     | 131                           | 75           | 206         | 15067  | 2260                   |      |
| 45                                      | Duck ( <i>Anas platyrhynchos</i> )                                     | 46         | ABCA1-201  | ENSAPLT00000015088.1     | 0                             | 77           | 77          | 0      | 2261                   |      |
| 46                                      | Flycatcher ( <i>Ficedula albicollis</i> )                              | 47         | ABCA1-201  | ENSFALT00000005231.1     | 0                             | 76           | 76          | 0      | 2262                   |      |
| 47                                      | Anole lizard ( <i>Anolis carolinensis</i> )                            | 48         | ABCA1-201  | ENSACAT00000014788.2     | 217                           | 77           | 294         | 35441  | 2258                   |      |
| 48                                      | Coelacanth ( <i>Latimeria chalumnae</i> )                              | 49         | ABCA1-201  | ENSLACT00000009960.1     | 241                           | 55           | 296         | 33177  | 1525                   |      |
| 49                                      | Platyfish ( <i>Xiphophorus maculatus</i> )                             | 50         | abca1a-201 | ENSXMAT00000006594.1     | 213                           | 43           | 256         | 3530   | 2270                   |      |
| 50                                      | Medaka ( <i>Oryzias latipes</i> )                                      | 51         | abca1a-201 | ENSORLT00000017693.1     | 90                            | 42           | 132         | 2863   | 2283                   |      |
| 51                                      | Tilapia ( <i>Oreochromis niloticus</i> )                               | 52         | abca1a-201 | ENSONIT00000020384.1     | 0                             | 43           | 43          | 0      | 2269                   |      |
| 52                                      | Tetraodon ( <i>Tetraodon nigroviridis</i> )                            | 53         | abca1a-201 | ENSTNIT00000001913.1     | 49                            | 43           | 92          | 119    | 2269                   |      |
| 53                                      | Zebrafish ( <i>Danio rerio</i> )                                       | 54         | abca1a-203 | ENSDDART00000167514.2    | 148                           | 40           | 188         | 2551   | 2268                   |      |
| 51                                      | Tilapia ( <i>Oreochromis niloticus</i> )                               | 55         | abca1b-201 | ENSONIT00000002004.1     | 0                             | 153          | 153         | 0      | 2337                   |      |
| 54                                      | Cave fish ( <i>Astyanax mexicanus</i> )                                | 56         | abca1b-201 | ENSAMXT00000016919.1     | 0                             | 742          | 742         | 0      | 2293                   |      |
| 53                                      | Zebrafish ( <i>Danio rerio</i> )                                       | 57         | abca1b-201 | ENSDDART00000051556.5    | 170                           | 35           | 205         | 5575   | 2282                   |      |
| 53                                      | Zebrafish ( <i>Danio rerio</i> )                                       | 58         | abca1b-202 | ENSDDART00000148461.2    | 0                             | 354          | 354         | 0      | 2271                   |      |
| 55                                      | Spotted gar ( <i>Lepisosteus oculatus</i> )                            | 59         | abca1a-201 | ENSLOCT00000014184.1     | 597                           | 40           | 637         | 3435   | 2262                   |      |
| Primates (N=17)                         |                                                                        |            |            |                          | Median:                       | 320          | 92          | 412    | 24875                  | 2261 |
| Rodents (N=16)                          |                                                                        |            |            |                          | Median:                       | 221          | 100         | 321    | 16750                  | 2261 |
| Placental mammals (N=7)                 |                                                                        |            |            |                          | Median:                       | 212          | 98          | 311    | 20170                  | 2261 |
| Marsupials and Platypus (N=3)           |                                                                        |            |            |                          | Median:                       | 0            | 95          | 137    | 0                      | 2264 |
| Reptiles and Birds and Coelacanth (N=5) |                                                                        |            |            |                          | Median:                       | 131          | 76          | 206    | 15067                  | 2260 |
| Ray finned fishes - abca1a (N=6)        |                                                                        |            |            |                          | Median:                       | 119          | 43          | 160    | 2707                   | 2269 |
| Ray finned fishes abca1b (N=3)          |                                                                        |            |            |                          | Median:                       | 0            | 254         | 280    | 0                      | 2288 |

Abbreviations: sp., species;

**Supplemental Table S2:** Summary of all species and names and IDs of transcripts downloaded from the Ensembl database, lengths of 5'UTR sections evaluated - whole 5'UTR, 5'UTR section located before-Intron-1, section located after-Intron-1, whole Intron 1 lengths, and ABCA1 protein lengths in amino acids.

## Supplemental Table S3

Table S3: Summary of alignment analyses (59 transcripts from Ensembl) performed with the help of 9 alignment programs.

| Program         | No. of most cons. nts | No. of most cons. nts within after Intron 1 sec. | Consensus seq. - start of 5'UTR sec. after Intron 1 | Consensus seq. - end of 5'UTR sec. after Intron 1 preceding mORF |
|-----------------|-----------------------|--------------------------------------------------|-----------------------------------------------------|------------------------------------------------------------------|
| <i>Clustal</i>  | 40                    | 38                                               | AG↓TTA <b>ATG</b> ACCAGCCAC                         | GCTGAGGTAAC( <b>ATG</b> )                                        |
| <i>ClustalO</i> | 16                    | 16                                               | AG↓TTA <b>ATG</b> ACCAGCCAC                         | GCGGGGGTAAC( <b>ATG</b> )                                        |
| <i>GLprobs</i>  | 37                    | 37                                               | AG↓TTA <b>ATG</b> ACCAGCCAC                         | GCTGAGGTAAC( <b>ATG</b> )                                        |
| <i>Mafft</i>    | 30                    | 28                                               | AG↓TTA <b>ATG</b> ACCAGCCAC                         | GCTGAGGTAAC( <b>ATG</b> )                                        |
| <i>MSAprobs</i> | 38                    | 38                                               | AG↓TTA <b>ATG</b> ACCAGCCAC                         | GCTGAGGTAAC( <b>ATG</b> )                                        |
| <i>Muscle</i>   | 41                    | 39                                               | AG↓TTA <b>ATG</b> ACCAGCCAC                         | GCTGAGGTAAC( <b>ATG</b> )                                        |
| <i>Probcons</i> | 39                    | 39                                               | AG↓TTA <b>ATG</b> ACCAGCCAC                         | GCTGAGGTAAC( <b>ATG</b> )                                        |
| <i>TCoffee</i>  | 22                    | 21                                               | AG↓TTA <b>ATG</b> ACCAGCCAC                         | GCTGAGGTAAC( <b>ATG</b> )                                        |
| <i>WebPRANK</i> | 26                    | 26                                               | AG↓TTA <b>ATG</b> ACCAGCCAC                         | GCTGAGGGAAC( <b>ATG</b> )                                        |
| <b>Median</b>   | <b>37</b>             | <b>37</b>                                        |                                                     |                                                                  |
| <b>Range</b>    | <b>16-41</b>          | <b>16-39</b>                                     |                                                     |                                                                  |

**Notes:** The most conserved nts had >80% identity and >84% occupancy scores. Position of the Intron 1 was specified by an arrow sign. ATG sequence in brackets is the first codon of the mORF.

**Abbreviations:** cons., conserved; no, number; nts, nucleotides; sec., section; seq., sequence;

**Supplemental Table S3:** Summary of multiple-sequence (59 transcripts) alignment analyses performed with the help of 9 alignment programs. Highly conserved nucleotides are those with >80% identity and >84% occupancy scores.

## Supplemental Table S4

Table S4: Upstream ATG and non-ATG start as well as stop codon comparison

| Sp. No. | Sp. Name                                                   | Tr. No. | No. of upstream start codons |                   |            |                   |            |                   |            |                   |            |                   | No. of upstream stop codons |                   |            |                   |            |                   |
|---------|------------------------------------------------------------|---------|------------------------------|-------------------|------------|-------------------|------------|-------------------|------------|-------------------|------------|-------------------|-----------------------------|-------------------|------------|-------------------|------------|-------------------|
|         |                                                            |         | uATGs                        |                   | uGTGs      |                   | uCTGs      |                   | uTTGs      |                   | uACGs      |                   | uTAGs                       |                   | uTAAs      |                   | uTGAs      |                   |
|         |                                                            |         | Wh. 5'UT R                   | Af. In. 1 section | Wh. 5'UT R | Af. In. 1 section | Wh. 5'UT R | Af. In. 1 section | Wh. 5'UT R | Af. In. 1 section | Wh. 5'UT R | Af. In. 1 section | Wh. 5'UT R                  | Af. In. 1 section | Wh. 5'UT R | Af. In. 1 section | Wh. 5'UT R | Af. In. 1 section |
| 1       | Chimpanzee (Pan troglodytes)                               | 1       | 1                            | 1                 | 7          | 3                 | 10         | 7                 | 5          | 0                 | 4          | 2                 | 3                           | 0                 | 4          | 1                 | 5          | 3                 |
| 2       | Bonobo (Pan paniscus)                                      | 2       | 1                            | 1                 | 7          | 3                 | 10         | 7                 | 5          | 0                 | 4          | 2                 | 3                           | 0                 | 4          | 1                 | 5          | 3                 |
| 3       | Human (Homo sapiens)                                       | 3       | 1                            | 1                 | 6          | 2                 | 10         | 7                 | 5          | 0                 | 3          | 2                 | 3                           | 0                 | 4          | 1                 | 5          | 3                 |
| 4       | Gorilla (Gorilla gorilla)                                  | 4       | 1                            | 1                 | 6          | 3                 | 9          | 7                 | 6          | 0                 | 3          | 2                 | 3                           | 0                 | 4          | 1                 | 5          | 3                 |
| 5       | Golden snub-nosed monkey (Rhinopithecus roxellana)         | 5       | 1                            | 1                 | 6          | 3                 | 10         | 7                 | 5          | 0                 | 2          | 1                 | 3                           | 0                 | 4          | 1                 | 5          | 3                 |
| 6       | Black snub-nosed monkey (Rhinopithecus bieti)              | 6       | 1                            | 1                 | 6          | 3                 | 11         | 7                 | 5          | 0                 | 2          | 1                 | 3                           | 0                 | 5          | 1                 | 6          | 3                 |
| 7       | Angola colobus (Colobus angolensis palliatus)              | 7       | 1                            | 1                 | 6          | 3                 | 13         | 7                 | 5          | 0                 | 3          | 2                 | 4                           | 0                 | 4          | 1                 | 5          | 3                 |
| 8       | Crab-eating macaque (Macaca fascicularis)                  | 8       | 3                            | 1                 | 9          | 3                 | 21         | 8                 | 8          | 0                 | 6          | 2                 | 9                           | 0                 | 7          | 1                 | 13         | 4                 |
| 9       | Pig-tailed macaque (Macaca nemestrina)                     | 9       | 1                            | 1                 | 9          | 3                 | 15         | 8                 | 6          | 0                 | 5          | 2                 | 4                           | 0                 | 6          | 1                 | 11         | 4                 |
| 10      | Macaque (Macaca mulatta)                                   | 10      | 1                            | 1                 | 6          | 3                 | 12         | 8                 | 6          | 0                 | 3          | 2                 | 4                           | 0                 | 5          | 1                 | 7          | 4                 |
| 11      | Drill (Mandrillus leucophaeus)                             | 11      | 1                            | 1                 | 6          | 3                 | 9          | 7                 | 6          | 0                 | 3          | 2                 | 4                           | 0                 | 4          | 1                 | 5          | 3                 |
| 12      | Vervet-AGM (Chlorocebus sabaeus)                           | 12      | 1                            | 1                 | 6          | 3                 | 10         | 7                 | 5          | 0                 | 3          | 2                 | 4                           | 0                 | 4          | 1                 | 5          | 3                 |
| 13      | Bolivian squirrel monkey (Saimiri boliviensis boliviensis) | 13      | 1                            | 1                 | 10         | 4                 | 12         | 8                 | 4          | 0                 | 4          | 1                 | 3                           | 1                 | 5          | 2                 | 6          | 4                 |
| 14      | Marmoset (Callithrix jacchus)                              | 14      | 1                            | 1                 | 8          | 3                 | 11         | 8                 | 2          | 0                 | 5          | 2                 | 0                           | 0                 | 3          | 2                 | 5          | 4                 |
| 15      | Tarsier (Carlito syrichta)                                 | 15      | 1                            | 1                 | 10         | 3                 | 10         | 7                 | 3          | 0                 | 3          | 1                 | 4                           | 0                 | 5          | 1                 | 3          | 1                 |
| 16      | Mouse Lemur (Microcebus murinus)                           | 16      | 1                            | 1                 | 9          | 4                 | 12         | 7                 | 1          | 0                 | 2          | 1                 | 2                           | 0                 | 4          | 1                 | 8          | 5                 |
| 17      | Bushbaby (Otolemur garnettii)                              | 17      | 0                            | nr.               | 4          | nr.               | 5          | nr.               | 0          | nr.               | 0          | nr.               | 0                           | nr.               | 0          | nr.               | 3          | nr.               |
| 18      | Long-tailed chinchilla (Chinchilla lanigera)               | 18      | 1                            | 1                 | 8          | 4                 | 8          | 3                 | 5          | 1                 | 4          | 1                 | 2                           | 0                 | 5          | 2                 | 4          | 2                 |
| 19      | Degu (Octodon degus)                                       | 19      | 1                            | nr.               | 2          | nr.               | 4          | nr.               | 1          | nr.               | 0          | nr.               | 0                           | nr.               | 2          | nr.               | 2          | nr.               |
| 20      | Naked mole-rat male (Heterocephalus glaber male)           | 20      | 1                            | 1                 | 6          | 3                 | 10         | 5                 | 3          | 2                 | 5          | 1                 | 2                           | 0                 | 1          | 1                 | 4          | 2                 |
| 20      | Naked mole-rat female (Heterocephalus glaber female)       | 21      | 1                            | 1                 | 6          | 3                 | 10         | 5                 | 3          | 2                 | 5          | 1                 | 2                           | 0                 | 1          | 1                 | 4          | 2                 |
| 21      | Squirrel (Ictidomys tridecemlineatus)                      | 22      | 1                            | 1                 | 9          | 3                 | 6          | 4                 | 4          | 2                 | 4          | 0                 | 1                           | 0                 | 4          | 2                 | 5          | 4                 |
| 22      | Chinese hamster CriGri (Cricetulus griseus crigri)         | 23      | 1                            | 1                 | 6          | 2                 | 11         | 6                 | 4          | 1                 | 3          | 2                 | 1                           | 0                 | 6          | 2                 | 1          | 1                 |
| 23      | Golden Hamster (Mesocricetus auratus)                      | 24      | 1                            | 1                 | 6          | 3                 | 8          | 3                 | 2          | 0                 | 4          | 2                 | 1                           | 0                 | 1          | 1                 | 1          | 1                 |
| 24      | Prairie vole (Microtus ochrogaster)                        | 25      | 2                            | 2                 | 4          | 1                 | 8          | 4                 | 4          | 2                 | 1          | 0                 | 0                           | 0                 | 2          | 2                 | 1          | 1                 |
| 25      | Northern American deer                                     | 26      | 1                            | 1                 | 4          | 2                 | 11         | 6                 | 2          | 0                 | 0          | 0                 | 0                           | 0                 | 3          | 2                 | 1          | 1                 |

|                            |                                                                         |                 |          |          |          |          |           |          |          |          |          |          |          |          |          |          |          |          |
|----------------------------|-------------------------------------------------------------------------|-----------------|----------|----------|----------|----------|-----------|----------|----------|----------|----------|----------|----------|----------|----------|----------|----------|----------|
|                            | mouse<br>(Peromyscus<br>maniculatus<br>bairdii)                         |                 |          |          |          |          |           |          |          |          |          |          |          |          |          |          |          |          |
| 26                         | Mouse (Mus<br>musculus)                                                 | 27              | 1        | 1        | 7        | 5        | 10        | 5        | 2        | 0        | 1        | 1        | 1        | 0        | 2        | 1        | 2        | 2        |
| 27                         | Algerian mouse<br>(Mus spretus)                                         | 28              | 1        | 1        | 6        | 4        | 9         | 5        | 2        | 0        | 1        | 1        | 1        | 0        | 2        | 1        | 2        | 2        |
| 28                         | Ryukyu mouse<br>(Mus caroli)                                            | 29              | 1        | 1        | 7        | 4        | 7         | 5        | 2        | 0        | 1        | 1        | 1        | 0        | 2        | 1        | 2        | 2        |
| 29                         | Shrew mouse<br>(Mus pahari)                                             | 30              | 1        | 1        | 7        | 4        | 10        | 5        | 2        | 1        | 2        | 2        | 2        | 0        | 2        | 1        | 2        | 2        |
| 30                         | Rat (Rattus<br>norvegicus)                                              | 31              | 1        | 1        | 6        | 4        | 11        | 4        | 3        | 0        | 1        | 0        | 2        | 0        | 6        | 2        | 1        | 1        |
| 31                         | Upper Galilee<br>mountains blind<br>mole rat<br>(Nannospalax<br>galili) | 32              | 1        | 1        | 6        | 3        | 7         | 5        | 1        | 0        | 3        | 1        | 1        | 0        | 2        | 2        | 3        | 3        |
| 32                         | Lesser Egyptian<br>jerboa (Jaculus<br>jaculus)                          | 33              | 1        | nr.      | 3        | nr.      | 5         | nr.      | 0        | nr.      | 0        | nr.      | 0        | nr.      | 1        | nr.      | 3        | nr.      |
| 33                         | Rabbit<br>(Oryctolagus<br>cuniculus)                                    | 34              | 2        | 1        | 3        | 2        | 5         | 4        | 10       | 2        | 4        | 0        | 2        | 0        | 5        | 2        | 4        | 2        |
| 34                         | Ferret (Mustela<br>putorius furo)                                       | 35              | 1        | 1        | 3        | 2        | 5         | 5        | 2        | 1        | 4        | 2        | 1        | 1        | 2        | 2        | 3        | 3        |
| 35                         | Dog (Canis<br>familiaris)                                               | 36              | 1        | nr.      | 1        | nr.      | 2         | nr.      | 0        | nr.      | 4        | nr.      | 0        | nr.      | 1        | nr.      | 2        | nr.      |
| 36                         | Cat (Felis catus)                                                       | 37              | 1        | 1        | 6        | 1        | 13        | 10       | 3        | 1        | 1        | 0        | 2        | 0        | 4        | 1        | 6        | 4        |
| 37                         | Horse (Equus<br>caballus)                                               | 38              | 1        | 1        | 7        | 2        | 7         | 4        | 2        | 1        | 2        | 2        | 0        | 0        | 3        | 2        | 5        | 3        |
| 38                         | Cow (Bos<br>taurus)                                                     | 39              | 10       | 1        | 13       | 3        | 21        | 6        | 15       | 0        | 4        | 1        | 7        | 0        | 4        | 2        | 14       | 3        |
| 39                         | Sheep(Ovis<br>aries)                                                    | 40              | 1        | 1        | 6        | 3        | 6         | 6        | 2        | 0        | 1        | 1        | 0        | 0        | 2        | 2        | 3        | 3        |
| 40                         | Armadillo<br>(Dasypus<br>novemcinctus)                                  | 41              | 1        | 1        | 7        | 1        | 7         | 4        | 3        | 1        | 6        | 4        | 2        | 0        | 5        | 2        | 4        | 3        |
| 41                         | Tasmanian devil<br>(Sarcophilus<br>harrisii)                            | 42              | 2        | nr.      | 3        | nr.      | 7         | nr.      | 0        | nr.      | 0        | nr.      | 0        | nr.      | 1        | nr.      | 3        | nr.      |
| 42                         | Opossum<br>(Monodelphis<br>domestica)                                   | 43              | 2        | 1        | 8        | 5        | 11        | 7        | 6        | 1        | 1        | 1        | 4        | 0        | 6        | 1        | 5        | 3        |
| 43                         | Platypus<br>(Ornithorhynchus<br>anatinus)                               | 44              | 4        | nr.      | 3        | nr.      | 9         | nr.      | 1        | nr.      | 0        | nr.      | 0        | nr.      | 3        | nr.      | 4        | nr.      |
| 44                         | Chicken (Gallus<br>gallus)                                              | 45              | 1        | 1        | 5        | 1        | 7         | 5        | 3        | 3        | 2        | 2        | 0        | 0        | 2        | 2        | 2        | 1        |
| 45                         | Duck (Anas<br>platyrhynchos)                                            | 46              | 1        | nr.      | 0        | nr.      | 6         | nr.      | 2        | nr.      | 0        | nr.      | 0        | nr.      | 1        | nr.      | 1        | nr.      |
| 46                         | Flycatcher<br>(Ficedula<br>albicollis)                                  | 47              | 1        | nr.      | 0        | nr.      | 7         | nr.      | 1        | nr.      | 0        | nr.      | 1        | nr.      | 1        | nr.      | 1        | nr.      |
| 47                         | Anole lizard<br>(Anolis<br>carolinensis)                                | 48              | 1        | 1        | 4        | 2        | 9         | 5        | 4        | 2        | 1        | 0        | 1        | 1        | 3        | 0        | 4        | 3        |
| 48                         | Coelacanth<br>(Latimeria<br>chalumnae)                                  | 49              | 2        | 2        | 3        | 1        | 7         | 4        | 1        | 0        | 0        | 0        | 3        | 0        | 7        | 1        | 1        | 1        |
| 49                         | Platyfish<br>(Xiphophorus<br>maculatus)                                 | 50              | 1        | 0        | 0        | 0        | 6         | 1        | 8        | 3        | 3        | 1        | 3        | 1        | 4        | 0        | 7        | 2        |
| 50                         | Medaka (Oryzias<br>latipes)                                             | 51              | 1        | 0        | 3        | 2        | 1         | 0        | 2        | 2        | 1        | 0        | 1        | 0        | 0        | 0        | 3        | 2        |
| 51                         | Tilapia<br>(Oreochromis<br>niloticus)                                   | 52              | 0        | nr.      | 2        | nr.      | 1         | nr.      | 1        | nr.      | 1        | nr.      | 0        | nr.      | 0        | nr.      | 2        | nr.      |
| 52                         | Tetraodon<br>(Tetraodon<br>nigroviridis)                                | 53              | 0        | 0        | 2        | 2        | 3         | 1        | 2        | 1        | 1        | 1        | 2        | 0        | 0        | 0        | 3        | 2        |
| 53                         | Zebrafish (Danio<br>rerio)                                              | 54              | 1        | 0        | 2        | 2        | 2         | 1        | 0        | 0        | 1        | 1        | 2        | 1        | 7        | 2        | 1        | 0        |
| 51                         | Tilapia<br>(Oreochromis<br>niloticus)                                   | 55              | 0        | nr.      | 4        | nr.      | 4         | nr.      | 6        | nr.      | 0        | nr.      | 1        | nr.      | 1        | nr.      | 4        | nr.      |
| 54                         | Cave fish<br>(Astyanax<br>mexicanus)                                    | 56              | 7        | nr.      | 14       | nr.      | 18        | nr.      | 14       | nr.      | 4        | nr.      | 8        | nr.      | 10       | nr.      | 20       | nr.      |
| 53                         | Zebrafish (Danio<br>rerio)                                              | 57              | 3        | 0        | 2        | 1        | 4         | 1        | 2        | 1        | 3        | 0        | 0        | 0        | 4        | 0        | 4        | 3        |
| 53                         | Zebrafish (Danio<br>rerio)                                              | 58              | 4        | nr.      | 3        | nr.      | 13        | nr.      | 8        | nr.      | 3        | nr.      | 4        | nr.      | 3        | nr.      | 10       | nr.      |
| 55                         | Spotted gar<br>(Lepisosteus<br>oculatus)                                | 59              | 5        | 0        | 5        | 1        | 12        | 3        | 12       | 0        | 5        | 0        | 7        | 0        | 16       | 0        | 8        | 2        |
| <b>Primates<br/>(N=17)</b> |                                                                         | <b>M.<br/>:</b> | <b>1</b> | <b>1</b> | <b>6</b> | <b>3</b> | <b>10</b> | <b>7</b> | <b>5</b> | <b>0</b> | <b>3</b> | <b>2</b> | <b>3</b> | <b>0</b> | <b>4</b> | <b>1</b> | <b>5</b> | <b>3</b> |

|                                         |         |   |   |   |   |   |   |   |   |   |   |   |   |   |   |   |   |
|-----------------------------------------|---------|---|---|---|---|---|---|---|---|---|---|---|---|---|---|---|---|
| Rodents (N=16)                          | M.<br>: | 1 | 1 | 6 | 3 | 8 | 5 | 2 | 1 | 2 | 1 | 1 | 0 | 2 | 2 | 2 | 2 |
| Placental mammals (N=7)                 | M.<br>: | 1 | 1 | 6 | 2 | 7 | 6 | 2 | 1 | 4 | 2 | 1 | 0 | 3 | 2 | 4 | 3 |
| Marsupials and Platypus (N=3)           | M.<br>: | 2 | 1 | 3 | 5 | 9 | 7 | 1 | 1 | 0 | 1 | 0 | 0 | 3 | 1 | 4 | 3 |
| Reptiles and Birds and Coelacanth (N=5) | M.<br>: | 1 | 1 | 3 | 1 | 7 | 5 | 2 | 2 | 0 | 0 | 1 | 0 | 2 | 1 | 1 | 1 |
| Ray finned fishes - abca1a (N=6)        | M.<br>: | 1 | 0 | 2 | 2 | 3 | 1 | 2 | 1 | 1 | 1 | 2 | 0 | 2 | 0 | 3 | 2 |
| Ray finned fishes abca1b (N=3)          | M.<br>: | 4 | 0 | 4 | 1 | 9 | 1 | 7 | 1 | 3 | 0 | 3 | 0 | 4 | 0 | 7 | 3 |

Abbreviations: M., median; nr., not relevant; sp., species; tr., transcript; Wh., whole; Af., after; In., intron;

**Supplemental Table S4:** Upstream ATG and non-ATG start as well as stop codon comparison – number and position.

## Supplemental Table S5

Table S5: 5'UTR GC content versus length comparison

| Species           | GC content (%) |             |          |                                   | Whole 5'UTR length (nts) |
|-------------------|----------------|-------------|----------|-----------------------------------|--------------------------|
|                   | Before In. 1   | After In. 1 | Whole r. | Subtr. After_In._1 - Before_In._1 |                          |
| Human             | 58.7           | 67.4        | 60.8     | 8.7                               | 395                      |
| Macaque           | 58.1           | 64.1        | 59.3     | 6                                 | 452                      |
| Mouse Lemur       | 61.9           | 62          | 61.9     | 0.1                               | 402                      |
| Rabbit            | 57.9           | 61.1        | 58.6     | 3.2                               | 418                      |
| Mouse             | 63.2           | 64          | 63.4     | 0.8                               | 320                      |
| Squirrel          | 60             | 60.4        | 60.1     | 0.4                               | 371                      |
| Cat               | 60             | 61.6        | 60.4     | 1.6                               | 399                      |
| Armadillo         | 63.7           | 67          | 64.5     | 3.3                               | 400                      |
| Tasmanian devil   | n. r.          | n. r.       | 57.9     | n. r.                             | 95                       |
| Opossum           | 51.7           | 61.1        | 53.8     | 9.4                               | 424                      |
| Platypus          | n. r.          | n. r.       | 52.6     | n. r.                             | 137                      |
| Chicken           | 77.9           | 49.3        | 67.5     | -28.6                             | 206                      |
| Flycatcher        | n. r.          | n. r.       | 46.1     | n. r.                             | 76                       |
| Anole lizard      | 63.6           | 49.4        | 59.9     | -14.2                             | 294                      |
| Coelacanth        | 32             | 47.3        | 34.8     | 15.3                              | 296                      |
| Zebrafish (A1a)   | 37.8           | 52.5        | 41       | 14.7                              | 188                      |
| Spotted gar (A1a) | 42.5           | 60          | 43.6     | 17.5                              | 637                      |

Abbreviations: In, Intron; n. r., not relevant; r., region; subtr., subtraction;

**Supplemental Table S5:** GC content versus length comparison in 5'UTRs of orthologous *ABCA1* genes.



## Supplemental Table S6

Table S6: Analysis of conserved RNA motifs and sites in human ABCA1 5'UTR - detailed information

| Motif_Type                             | Motif_Name                                                                       | Position  | Human  |                         |
|----------------------------------------|----------------------------------------------------------------------------------|-----------|--------|-------------------------|
|                                        |                                                                                  |           | Length | Sequence                |
| exon splicing enhancer (ESE)           | ct/cgrp intron downstream from exon 4                                            | 217 ~ 225 | 9      | tttttccc                |
|                                        | sc35 - exonic splicing enhancer                                                  | 113 ~ 120 | 8      | gacccgca                |
|                                        | sc35 - exonic splicing enhancer                                                  | 356 ~ 363 | 8      | ggctcccg                |
| exon splicing silencer (ESS)           | fibronectin eda exon                                                             | 260 ~ 265 | 6      | caaggg                  |
| intron splicing enhancer (ISE)         | gh-1 intron 3                                                                    | 384 ~ 393 | 10     | ggctgagggga             |
|                                        | gh-1 intron 3                                                                    | 105 ~ 114 | 10     | ggggccggga              |
|                                        | ighg2 cgamma2 (immunoglobulin heavy chain subclass g2 - cgamma2 gene) - intron 1 | 99 ~ 104  | 6      | gtgagt                  |
|                                        | ighg2 cgamma2 (immunoglobulin heavy chain subclass g2 - cgamma2 gene) - intron 1 | 331 ~ 336 | 6      | gtgagc                  |
|                                        | ctnt, exon 5                                                                     | 253 ~ 259 | 7      | ggcttgt                 |
|                                        | ctnt, exon 5                                                                     | 384 ~ 390 | 7      | ggctgag                 |
| rho-independent terminator             | Rho-independent Terminator                                                       | 197 ~ 215 | 19     | cagggcgctttgtccttg      |
| Transcriptional regulatory motif (TRM) | Sp1                                                                              | 158 ~ 170 | 13     | gcagggcggggag           |
|                                        | Elk-1                                                                            | 243 ~ 256 | 14     | ttctccggaaggct          |
|                                        | TATA                                                                             | 51 ~ 65   | 15     | ctataaaaggaacta         |
|                                        | Msx-1                                                                            | 81 ~ 89   | 9      | ccgtaattg               |
|                                        | TFIIA                                                                            | 52 ~ 63   | 12     | tataaaaggaac            |
|                                        | Kid3                                                                             | 315 ~ 319 | 5      | ccacg                   |
|                                        | NFAT1                                                                            | 295 ~ 300 | 6      | ggaaaa                  |
|                                        | NF-AT4                                                                           | 295 ~ 300 | 6      | ggaaaa                  |
|                                        | HOXA13                                                                           | 53 ~ 58   | 6      | ataaaa                  |
|                                        | ER81                                                                             | 246 ~ 255 | 10     | tccggaaggc              |
|                                        | PEA3                                                                             | 246 ~ 255 | 10     | tccggaaggc              |
|                                        | ETV7                                                                             | 246 ~ 255 | 10     | tccggaaggc              |
|                                        | E2F-3                                                                            | 162 ~ 168 | 7      | ggcgggg                 |
| UTR motifs                             | Musashi binding element (MBE)                                                    | 20 ~ 24   | 5      | atagt                   |
| microRNA target sites                  | hsa-miR-4435                                                                     | 323 ~ 345 | 23     | tccctgctgtgagctctggccgc |
|                                        | hsa-miR-5581-5p                                                                  | 236 ~ 256 | 21     | tctccccttctccggaaggct   |

**Supplemental Table S6:** Analysis of conserved RNA motifs and sites in human ABCA1 5'UTR – detailed information.

## **Supplementary Information 2 – Supplementary Figures**

### Supplemental Figure S1

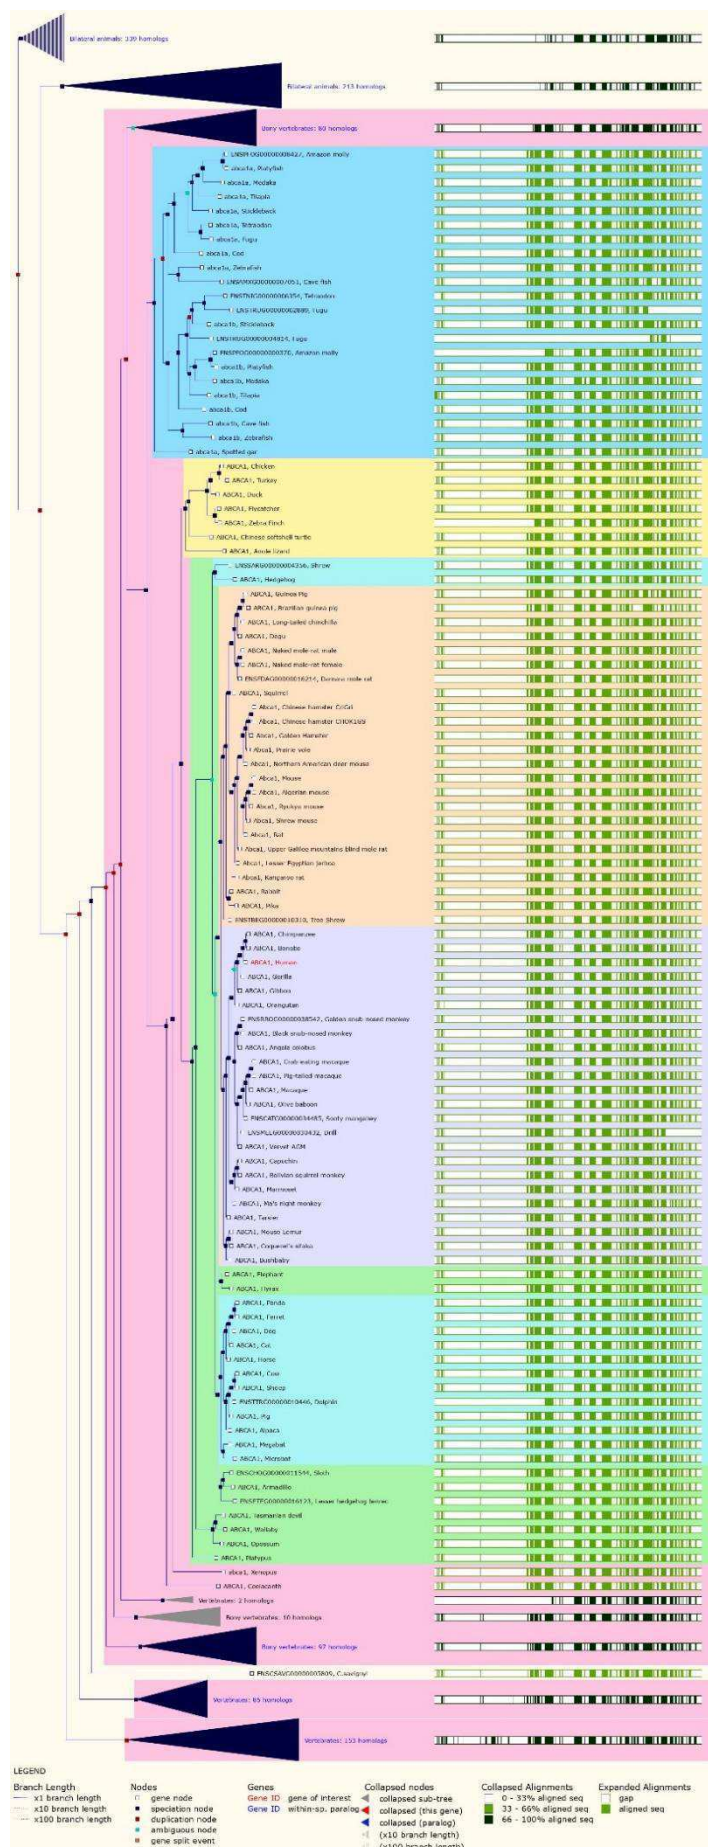

Supplemental Figure S1: The *ABCA1* gene tree created by the Gene Tree tool – Ensembl database.

# Supplemental Figure S2

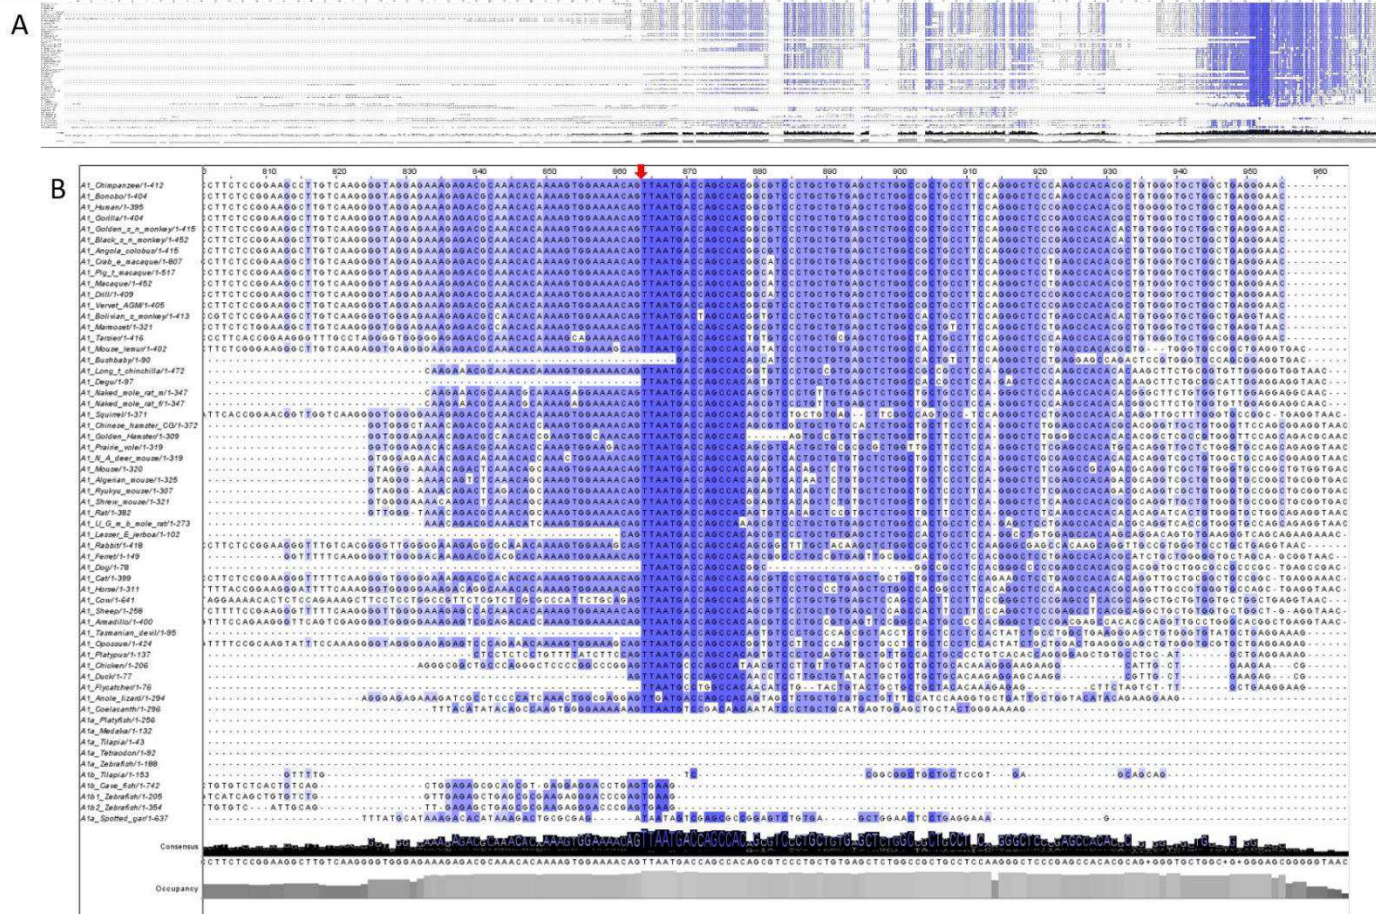

Supplemental Figure S2: Results of the ABCA1 5'UTR multi-sequence alignment analysis in the ClustalO program performed on 59 transcripts downloaded from the Ensembl database. Lines represent transcripts, which were aligned according to the ClustalO algorithm; the conservation of nucleotides among vertebrate species is highlighted with the most conserved ones having the darkest color. A) Alignment of the whole 5'UTRs. 5'UTR segments, which contain conserved nucleotides can be distinguished. B) Detail of the 5'UTR segment containing the most conserved sequences; the position of the spliced Intron 1 is marked by a red arrow.



## Supplemental Figure S3

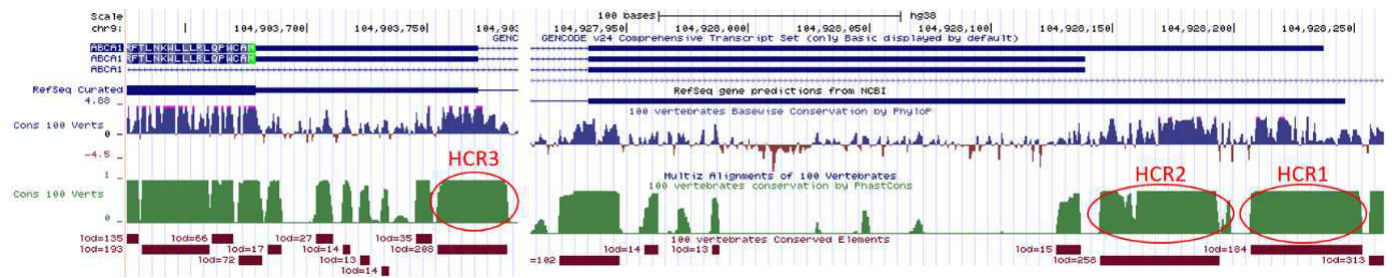

Supplemental Figure S3: Results of the conservation track focused on the 5'UTR region of the human *ABCA1* gene performed in UCSC Genome Browser. Three highly conserved regions (HCR1-HCR3) can be distinguished. HCR3 is overlapping with the most conserved sequence displayed on Figure 4 in the main text.



CCGGAGCGCGCCGCGCTCGGCGCCGATCCGTGAGTTGCGAGATCTCTCGGAGAAATGAGAGCGAGAGCCGACTCGGCTCGGTGCGGACCGAGGCGCGCTCCAGGCGTCCCCGCCCCGAGTTAATGCGCCAGCCATAACGTCCTGTGTGTATGCTGCTGCTGCTGACAAAGGAGAGAGAGGCTATTTGAGAGAGC

AGTTAATGCCAGCCACACCTCTCTTATATATGCTCTCTCCACAAAGGAGCAAGGCGTTTCTAGAGGCC

TTAATGCTGGCCACAACATCTGTATCTGATCTCTGCTCTACACAAGAGAGCTTCTAGTCTTTCTGAAGGAAG

[illegible]

GC TGGTACAGAGCTCTCTGGTGTGACACTATAAAGCACTATGAGTGTAAAAAAACAACTTCAGTCTCTACATCGATGATCAGAGACACCTCAAGACCATATATATATCTGTCACGATAAACAAGAAAAAGAAAAATATATATATTATTAAAGGATTTTAAAGAAAGATACTATATATTCTCTAGTAGGAGATTGTGTCATTTTGGTTTAACTATATTTCATCATACACCAAGTGGGAAAAAATCTAAATGATCGCCACAACTATCTCTCTCATGAGTGGAGCTCTAAGGAAAAAG

TACCGTGAATACCTTTTCTCCCTCCGCTCAAGCTGATATAAAGCTTCTGGGAGAAAAACAGTTTCTTACACACAAAAGACAAAGAGGACCCGCGCTCAAGAGACGCACTGTAACTCTGTTTTCCTTTGCTTTGTTTGAAGAAAGACCTTCAATTGATGAGAGCGAAGAGCCAGTAACACATTAAATCAAGAGAGAGCTTCTGCTTGGAGGTTAGGTTAGGAGACGCAAG

GCGAGACTCACCSCGAGTCCCGACAGGGAGTTTATTCTCTGTTTTTGGACACCCCTATGACACGAACACAGAGTGGATAGAAAAAATGAGGATCAGSAGTTTCTTGTAAGGTGGGAGAGACAC

TSAGGAGCTGGAGCGTCTCNGTGAAGTTGGGAGACGGCAGC

TCTAGCCGCTTTTATGAGCGTCTTTCTCTCAACTTTCCTTCATTAGTGGAGGAGCGCTGCTCGGTGAGGTTGGGACGACATCAAG

GGAAAAGGTCCCTCCATAGAACACAAACACCAACCTACACATATCTCCGAGAGAGTTTAAACAGCTTTTATCTCTCTTTCTAAAAGGATTACAGTTTATATGAATAAAGAACATCTATTAAGGACCAAGAAATAGCGCTTTTAAAGGCGACGAGATAGTGTGTATCCCGGTAAAG

ACCGGTTTGTAAAGCTCCACCAACATTCTGTAGTTCGTTTCCCTCCCTTTCGCGGCGGGTTTATTTTGAAGGTCCTTTCGCGAAGTGTTGTGTGACTATTGGGGCTTTACTCCGGTGAGTTTGTCCGGCGGGTTCCTCTCCGTGASCAGACAT

[illegible][illegible][illegible]

5





CCGGAGCGCGCCGCGTCCGGGCGGAFCCGTGAGTGACAGCTCCGCTCGGAGAAGTGAGSCGAAGCGAGCCGACTCGGCTCGGTGCGGGACCGAGGGCGGCTGCCCAAGGCTCCCGGGCCCGGAGTTAATGCCCAAGCATAAGCTCTGGTGTGTACTGCTGCTGCTGCAAAAGGGAGAAGGCACTGTAAGAAAC

AGTTAATGCCAGCCACACCTCTCTGCTGATACTGCTGCTGCTGCACAGAGSAGCAAGGCCCTGCTGAGAGCCG

TTAATGCTTGCCACACATCTGTACTGTACTGCTGCTACACAAAGAGACTTCTAGTCTTCTGGAAGGAAG

[illegible]

GCCTGTACAGCGCTGCTCGGTGTGCACATATAAAAGCACTGAGGGTAAAAAANATTTCAGTCTTACATCGAATCAGAGACACTCAGAGCCATATATATCGTTCACAGTAAACAAGAAAAAAGAAAAATATATATATTTAGGGAATTTAAAGAAAGTACTATATTTCTAGTAGGGAATTCATTTTCTGGTTTAACTATATTTTACATATACAGCCAGTGGGGAAAAAGTTAATGTCCGACACAAATATCCCTGTGCATGAGTGGAGCTGCTACGGGAAAG

TGAACCTTAGTTACCTTCTGCGCTCCGGTCGAGCTGCGTATAAAGCGCTGCTGCGGGAGAAAAACAGTTTCTAGACACTGACAAAGAGCAAGGAGGACGCGCGCTGCGAGGGGAGCGAGTTTAACTCGTTTTTCGCTTTGAGAAAAGGACGTCATGTTGAGGGGAGAGAGCGAGTAAACACATTAGATCAGTGGAGGCTGGCGGCTGAGTTAGGAGAGCGCAAG

CGCGACTCACCGGAGTCCCGACAAAGGGAAGTTTATTCCTCGTTTTCTGGGACACCCCTATGACACGAACAAGAGTGGATAGAAAAAAGTGGAGGATCAGGAGTTGGAGGTGGGAGAGAGCAAC

TSAGGAGCTGGAGCGTCTCAGTGAAGTGGAGGACGGCAC

TCATGCCCGTTACTGAGCGTCTTTCCTCTGTCAACTTCTTCATTATGTTGAGGAGCTGGAGCGTGCTCTGGTGAAGTTGGAGCGACATCAAC

(G)AAGAGG(TCC)GTCCATAGAACACAAAGCACCACAGTACANTATGCTCGGAGAGAGTTTAAACAGCTGCTTTATCTCTCTTTCTAAGAGATTACAGTATTATATGAATAGGAGACATCATTAAGGAGCAGGAATAGCGCTCTCTGTAGGCGGCACGGATAGTGTGTATCCGTGTGTAA

ACCGGTTCTAAACCTTCACCAACATCTCTGATTCGTTTCCTCCCTGCGGCTCGGATTTTATTTGAGGCTCTGCGGGAAGTGTTCTGACTATGAGGCTTTACTCCGTTGAGTTTCCGACCGGCTGCTGCTCCGTTGAGCAGCA

[illegible]

GACCCACAGTAACCCAGGCGCTCCGAGCGGATGCGCTATAAAACCACTTTAAACCTTTCAGATGCCCTTCACACAGAACCAACCGCGTCAGACTCCACAGGACGGAATAAATCTGTATTCACCTGATTACACGGAATGTCTACACAGGTCATCAAGCTGTGTCTCGAGAGCTGAGCGCGAAGAGGGACCCCGAGTGAAG

[illegible][illegible]

7

NCBI Resources ☒ How To ☒ Sign in to NCBI

ORFfinder

Open Reading Frame Viewer [Help](#)

Sequence

ORFs found: 5 Genetic code: 1 Start codon: 'ATG' only

Find:

(U) ORFfinder\_11.26.154554586

1: 1..697 (697bp)

ORF1 (111 nt)

ORF1 CDS translation

```

1 ATGACCAGCCACGGGGTCCCTGCTGTGAGCTCTGGGDDGCTGGCTT
  M T S N G V P A V S S G R C L
46 CCAGGGCTCCCGAGCCACAGCTGGGGTCTGCTGAGGGGAACA
  P G L P S H T L G V L A E G T
91 TGGCTTGTGGGCTCAGCTGA
  M L V G L S *

```

Mark subset... Marked: 1  as

| Label | Strand | Frame | Start | Stop | Length (nt   aa) |
|-------|--------|-------|-------|------|------------------|
| ORF5  | -      | 1     | 397   | >2   | 396   131        |
| ORF4  | +      | 3     | 396   | >695 | 300   99         |
| ORF2  | +      | 1     | 541   | >696 | 156   51         |
| ORF1  | +      | 1     | 307   | 417  | 111   36         |
| ORF3  | +      | 2     | 461   | 544  | 84   27          |

ORF1

Marked set ( 1 )

[SmartBLAST best hit titles...](#)

BLAST Database:

Upstream ORF discussed within the main text was predicted as ORF1 and known main ORF as ORF4.

## Supplemental Figure S7

### Translation Initiation Site Prediction

#### Prediction Results

```
>ABCA1 Human E1 E2 E3 E4
AGAGCACAGGCTTTGACCGATAGTAACCTCTGCGCTCGGTGACGCCGAATCTATAAAAGG
AACTAGTCCCGGCAAAAACCCGTAATTGCGAGCGAGAGTGAGTGGGGCCGGGACCCGCA
GAGCCGAGCCGACCTTTCTCTCCCGGGCTGCGGCAGGGCAGGGCGGGGAGCTCCGCGCAC
CAACAGAGCCGGTTCTCAGGGCGCTTTGCTCCTTGTTTTTCCCGGTTCTGTTTTCTCC
CCTTCTCCGGAAGGCTTGTCAAGGGTAGGAGAAAGAGACGCAACACAAAAGTGGAAA
CAGTTAATGACCAAGCCACGGCGTCCCTGCTGTGAGCTCTGGCCGCTGCCTTCCAGGGCTCCCG
AGCCACACGCTGGGGGTGCTGGCTGAGGGAACATGGCTTGTTGGCTCAGCTGAGGTTGC
TGCTGTGGAAGAACTCAGTTTCAGAAAGAGACAAACATGTCAGCTGCTGCTGGAAGTGGCCT
GGCCTCTATTATCTTCTGATCCTGATCTCTGTTCCGGCTGAGCTACCCACCCTATGAACAACAT
GAATGCCATTTTCCAAATAAAGCCATGCCCTCTGCAGGAACACTTCTTGGGTTGAGGGGATTA
TCTGTAATGCCAACAAACCCCTGTTTCCGTTACCCGACTCCTGGGAGGGCTCCCGAGTTG
TTGGAAACTTTAACAAATCCAT
```

| Position | Context        | Prediction Score | Predicted |
|----------|----------------|------------------|-----------|
| 307      | AGTTAATGACCAG  | 1.000484834932   | Yes       |
| 396      | GGAAACATGGCTTG | 0.767714554146   | ---       |
| 461      | CAAAACATGTCAGC | 0.883724617599   | ---       |
| 541      | ACCCTATGAACAA  | 1.000669928285   | Yes       |
| 550      | ACAAACATGAATGC | 0.882354680182   | ---       |
| 554      | CATGAATGCCATT  | 1.000033349677   | Yes       |
| 576      | AAGCCATGCCCTC  | 0.930832456891   | ---       |
| 622      | CTGTAATGCCAAC  | 0.931964887995   | ---       |

Designed & Developed By: Suhas Tikole

Copyright (c) 2006 All rights reserved, IIT Kanpur.

Laboratory of Computational Biology  
Department of Biological Sciences and Bioengineering  
Indian Institute of Technology Kanpur -208016  
INDIA

Supplemental Figure S7: Results obtained from the WeakAUG server.

↓ specifies the position of Intron 1

10

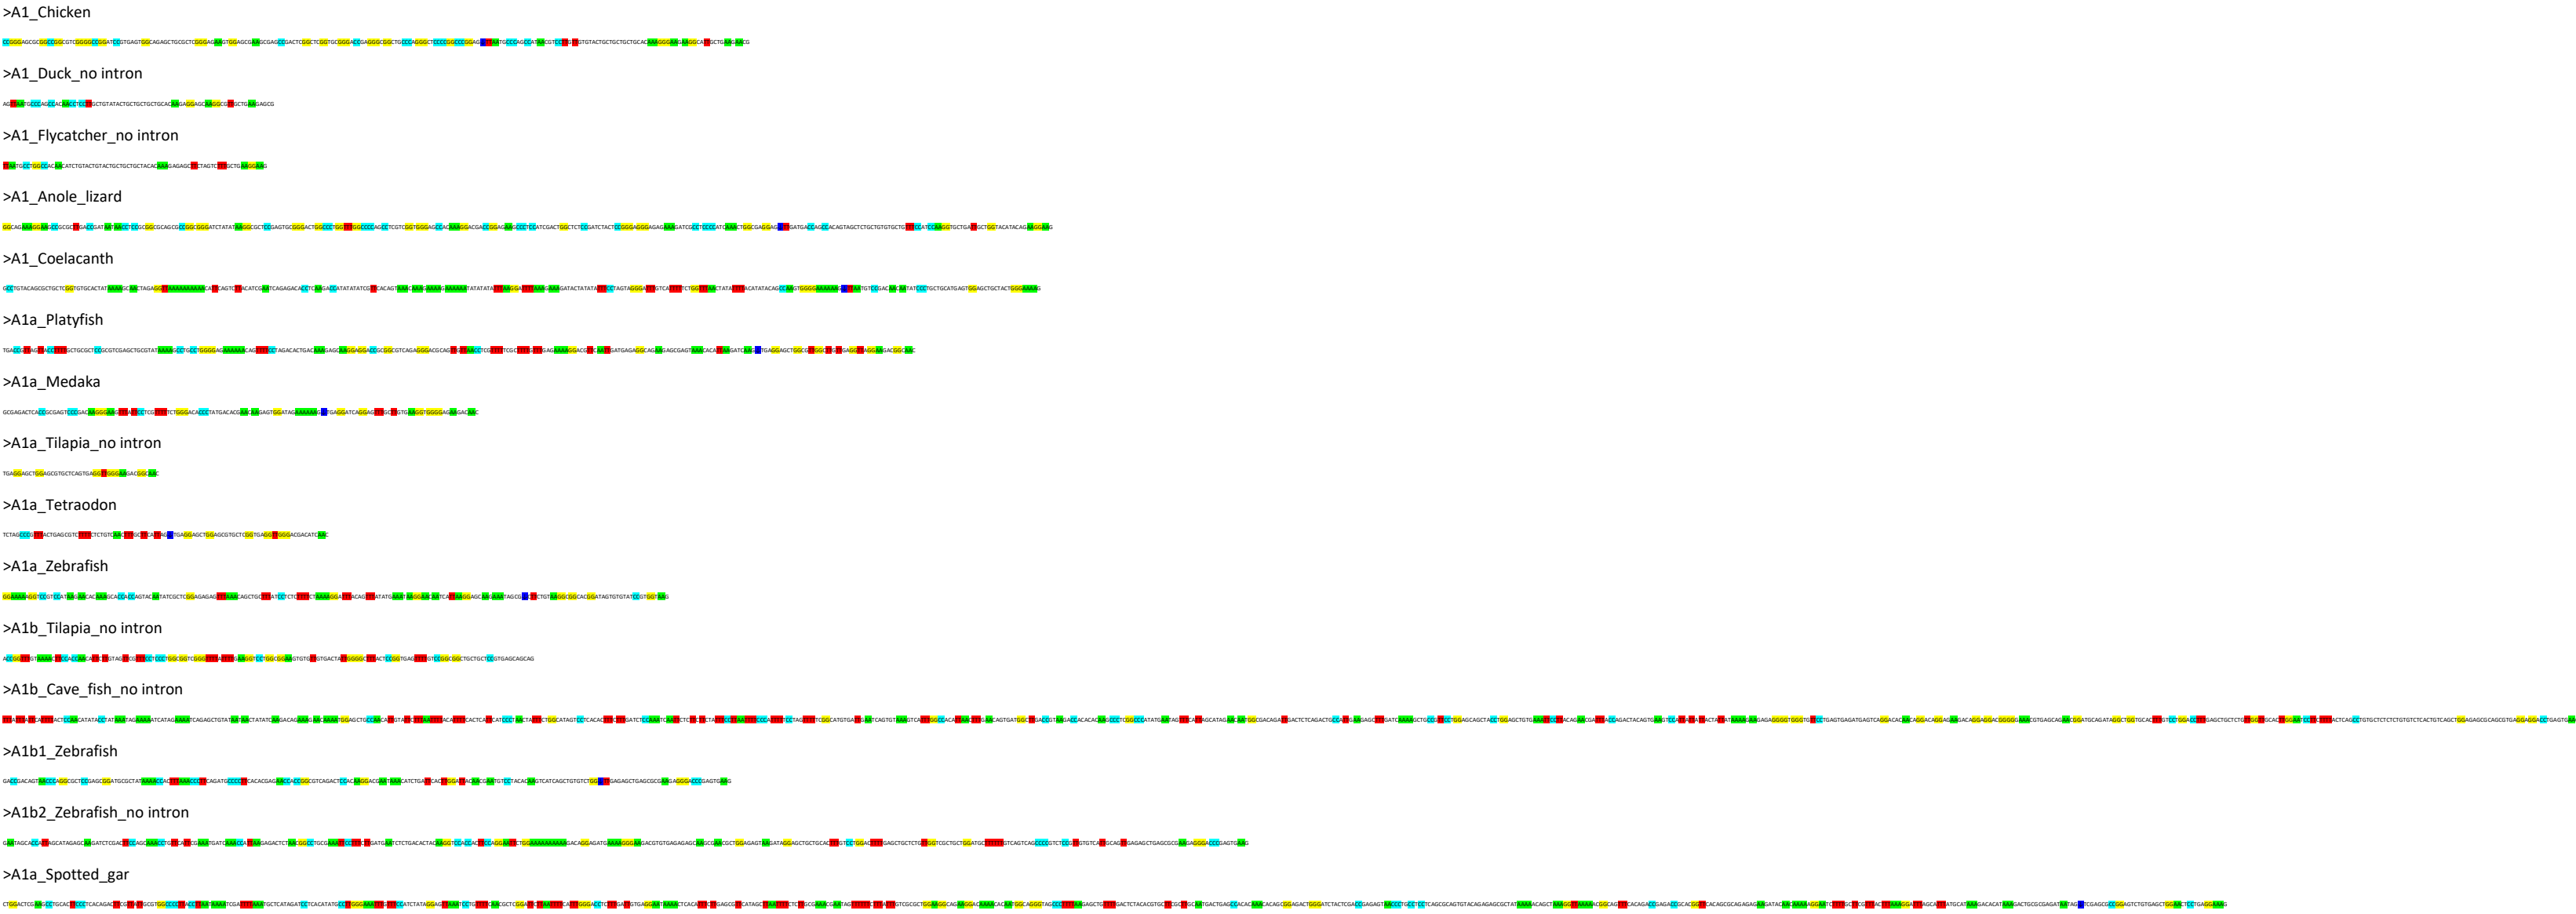

Supplemental Figure S8: Analysis of specific base-repetition-rich subregions in 5'UTRs of orthologous *ABCA1* genes, 5'UTR sequences of 55 species were downloaded from the Ensembl database.

Supplemental Figure S9

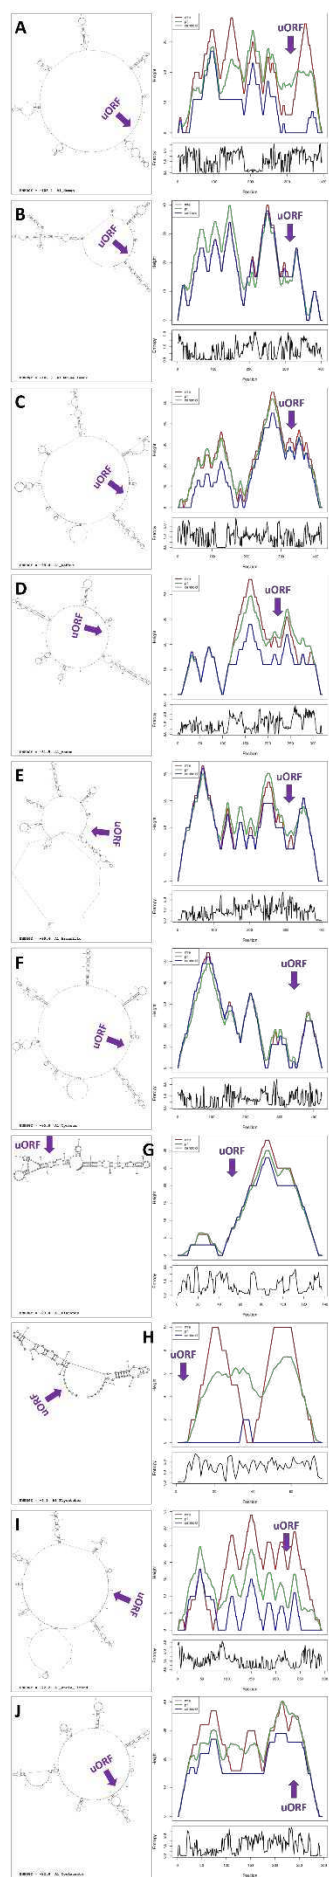

Supplemental Figure S9: Secondary structure comparison of *ABCA1* 5'UTRs in 10 vertebrate species. Two web servers – RNAstructure (secondary structure diagrams) and RNAfold (mountain plots) were employed independently. Results of the following species are disclosed: A) Human, B) Mouse lemur, C) Rabbit, D) Mouse, E) Armadillo, F) Opossum, G) Platypus, H) Flycatcher, I) Anole lizard, and J) Coelacanth. Start position of the uORF discussed in the main text is marked with an arrow.

## Supplemental Figure S10

Gene: ABCA1

Human (GRCh37.p13)

Transcript: ABCA1-002 ENST00000374736.3

5'UTR sequence

TATA TFIIA HOXA13

AGAGCAAGGCTTTGACCGA TAGTAACCTCTGCGCTCGGTGCAGCCGAATCTATAAAAGG

Ighg2      Gh-1      Sc35

AACTAGTCCCGGC~~AAAA~~ACCCGTAATTGCGAGCGAGAGTGAGTGGGGCCGGGACCCGCA

GAGCCGAGCCGACCCTTCTCTCCCGGGCTGCGGCAGGGCAGGGCGGGGAGCTCCGCGCAC

CAACAGAGCCGGTTCTCAGGGCGCTTIGCTCTTGTTTTTTCCCCGGTTCTGTTTTCTC

Ctnt      FEE      NFAT1/4

CCTTCTCCGGAAGGCTTGTCAAGGGGTAGGAGAAAGAGACGCAAACACAAAAGTGGAAAA

uORF      Ighg2      Sc35

CAGTTAATGACCAGCCACGGCGTCCCTGCIGTGAGCTCTGGCCGCTGCCTTCCAGGGCTCCCG

Ctnt   Gh-1

AGCCACACGCTGGGGGTGCTGGCTGAGGGAAC

Notes:

5'UTR variants according to Ensembl in blue color

5'UTR hot spots defined by the study in red

Nucleotides matching both criteria in orange

Supplemental Figure S10: Analysis of the human *ABCA1* 5'UTR variants from Ensembl versus hot spots defined by the study.
